# Supplementary material
Source: publisher site journal article supplement (https://www.spandidos-publications.com/2151/downloadSupplementary)
Supplement: Supplementary file 1 [file downloadSupplementary]

## Sheet: Sheet1
Table SIII. Differentially expressed genes after steroidogenic acute regulatory protein-related lipid transfer 4 knockdown in breast cancer cells.
Entrez	Gene symbol	Gene title	8025-1	8025-2	8025-3	8026-1	8026-2	8026-3	Fold change	log fold change	Absolute fold change	Regulation	P-value	FDR
113263	GLCCI1	glucocorticoid induced 1	5.67896	5.77791	5.84676	6.16346	6.24825	6.27739	1.37728	0.461823	1.37728	up	2.91827e-06	6.47219e-05
55664	CDC37L1	cell division cycle 37-like 1	5.0037	4.89584	4.97873	5.29278	5.36712	5.35988	1.3018	0.380503	1.3018	up	5.1493e-05	0.000626644
57221	ARFGEF3	ARFGEF family member 3	4.01265	4.02925	3.8158	3.62277	3.52473	3.43695	-1.34203	-0.424417	1.34203	down	0.000239818	0.00214453
200058	FLJ23867	uncharacterized protein FLJ23867	7.27067	7.3688	7.48396	7.74488	7.88878	7.73627	1.33376	0.4155	1.33376	up	2.80841e-06	6.27808e-05
83892	KCTD10	potassium channel tetramerization domain containing 10	7.99712	7.99306	7.98839	7.3647	7.35593	7.3709	-1.54651	-0.629013	1.54651	down	4.70443e-11	1.54958e-08
725	C4BPB	complement component 4 binding protein, beta	9.59618	9.62416	9.59284	9.99066	9.97934	10.02	1.31248	0.39229	1.31248	up	2.00332e-10	4.45303e-08
3157	HMGCS1	3-hydroxy-3-methylglutaryl-CoA synthase 1	9.14424	9.24415	9.21608	8.27699	8.26354	8.29362	-1.89663	-0.92344	1.89663	down	8.14042e-14	1.88398e-10
6744	SSFA2	sperm specific antigen 2	8.91775	9.00553	8.78535	8.49956	8.44473	8.54149	-1.32649	-0.407617	1.32649	down	4.81188e-07	1.61535e-05
4752	NEK3	NIMA-related kinase 3	5.55278	5.64935	5.58067	5.00561	5.263	5.27393	-1.33184	-0.41342	1.33184	down	0.000108375	0.00113977
6773	STAT2	signal transducer and activator of transcription 2	4.79964	4.87086	4.88267	5.11088	5.26497	5.42045	1.33272	0.414377	1.33272	up	0.000151929	0.00148842
9962	SLC23A2	solute carrier family 23 (ascorbic acid transporter), member 2	5.69237	5.64935	5.57671	5.28809	5.2733	5.06004	-1.34941	-0.432333	1.34941	down	4.13198e-05	0.000527478
286205	SCAI	suppressor of cancer cell invasion	5.77124	5.81551	5.38469	4.87919	4.88189	5.11118	-1.6242	-0.699727	1.6242	down	9.16271e-06	0.000159301
28985	MCTS1	malignant T-cell amplified sequence 1	7.19335	7.19426	7.04268	6.60128	6.42451	6.67449	-1.4914	-0.57667	1.4914	down	3.41918e-07	1.2519e-05
54946	SLC41A3	solute carrier family 41, member 3	7.46809	7.39385	7.5792	7.81846	7.90131	7.86697	1.30303	0.381867	1.30303	up	1.17292e-06	3.22484e-05
4603	MYBL1	v-myb avian myeloblastosis viral oncogene homolog-like 1	8.69672	8.62998	8.63638	9.32325	9.26068	9.31049	1.56242	0.64378	1.56242	up	5.44427e-12	3.75789e-09
23317	DNAJC13	DnaJ heat shock protein family (Hsp40) member C13	7.10336	7.05645	6.78386	6.23168	6.29734	6.4364	-1.57944	-0.659417	1.57944	down	5.8116e-07	1.87573e-05
202243	CCDC125	coiled-coil domain containing 125	4.565	4.38575	4.91261	3.96306	3.73735	4.11146	-1.6064	-0.68383	1.6064	down	6.86169e-05	0.000788223
3156	HMGCR	3-hydroxy-3-methylglutaryl-CoA reductase	7.88236	7.99348	7.93646	7.34344	7.45416	7.44281	-1.4379	-0.523963	1.4379	down	8.22519e-09	7.22818e-07
51124	IER3IP1	immediate early response 3 interacting protein 1	9.13243	9.13277	9.02751	9.53101	9.43195	9.48218	1.30508	0.384143	1.30508	up	2.691e-08	1.72748e-06
409	ARRB2	arrestin, beta 2	5.16447	4.97949	5.26733	5.45511	5.46709	5.63235	1.30232	0.381087	1.30232	up	0.000359063	0.00295976
8878	SQSTM1	sequestosome 1	9.35357	9.34022	9.3359	8.79755	8.86516	8.83927	-1.4233	-0.509237	1.4233	down	4.29535e-11	1.47883e-08
100533496	TVP23C-CDRT4	TVP23C-CDRT4 readthrough	6.48044	6.36666	6.4305	6.7663	6.82371	6.95841	1.34128	0.423607	1.34128	up	3.34415e-06	7.16624e-05
57509	MTUS1	microtubule associated tumor suppressor 1	7.10683	7.07299	7.17222	7.6008	7.56825	7.61282	1.39147	0.47661	1.39147	up	1.6212e-08	1.18779e-06
6160	RPL31	ribosomal protein L31	6.65159	6.56222	6.75236	7.24181	7.33203	7.44193	1.6057	0.6832	1.6057	up	1.54232e-08	1.15144e-06
9991	PTBP3	polypyrimidine tract binding protein 3	5.58577	5.55889	5.64455	4.78544	4.9055	4.99849	-1.62442	-0.699927	1.62442	down	1.14207e-07	5.40716e-06
100130562	RPS2P5	ribosomal protein S2 pseudogene 5	11.2974	11.2497	10.7588	10.7788	10.4044	10.3891	-1.49266	-0.577883	1.49266	down	0.000197087	0.00182968
50618	ITSN2	intersectin 2	6.78531	6.85373	6.96026	6.2217	6.36856	6.44437	-1.4355	-0.521557	1.4355	down	9.96494e-07	2.84102e-05
50804	MYEF2	myelin expression factor 2	6.56883	6.76182	6.61626	6.07549	6.02268	6.196	-1.46501	-0.550913	1.46501	down	5.28812e-07	1.7396e-05
54478	FAM64A	family with sequence similarity 64 member A	8.86469	8.89602	8.87541	9.28503	9.29772	9.31254	1.33767	0.419723	1.33767	up	2.94424e-10	6.00198e-08
51099	ABHD5	abhydrolase domain containing 5	3.78644	3.71881	3.77096	4.18436	4.02226	4.24014	1.31056	0.390183	1.31056	up	0.000269812	0.00234855
2799	GNS	glucosamine (N-acetyl)-6-sulfatase	8.41161	8.40808	8.44044	7.97455	7.9535	8.06462	-1.34024	-0.422487	1.34024	down	1.45044e-08	1.10378e-06
22879	MON1B	MON1 homolog B, secretory trafficking associated	6.38858	6.36628	6.36218	6.02446	5.98337	5.95067	-1.30693	-0.38618	1.30693	down	3.31679e-06	7.13081e-05
6611	SMS	spermine synthase	11.134	11.09	10.994	9.87348	9.87612	9.88073	-2.29081	-1.19586	2.29081	down	7.93113e-16	6.62585e-12
10478	SLC25A17	solute carrier family 25 (mitochondrial carrier; peroxisomal membrane protein, 34kDa), member 17	5.72404	5.89399	5.99675	5.31074	5.25354	5.23483	-1.52121	-0.605223	1.52121	down	8.83305e-07	2.59737e-05
55425	GPALPP1	GPALPP motifs containing 1	5.67197	5.87215	5.81842	5.44117	5.31189	5.41505	-1.31781	-0.398143	1.31781	down	5.0983e-05	0.000621977
114800	CCDC85A	coiled-coil domain containing 85A	3.93398	4.14861	4.16524	4.39165	4.64615	4.57264	1.37003	0.454203	1.37003	up	0.000176527	0.00167316
9976	CLEC2B	C-type lectin domain family 2, member B	5.20596	5.23615	5.44855	5.73337	5.62618	5.72858	1.31874	0.399157	1.31874	up	9.48004e-05	0.00102468
3151	HMGN2	high mobility group nucleosomal binding domain 2	7.62729	7.6573	7.71352	8.00912	8.05993	8.09934	1.31048	0.390093	1.31048	up	8.67915e-08	4.31697e-06
64854	USP46	ubiquitin specific peptidase 46	4.54831	4.8592	4.74534	5.08154	5.07709	5.18422	1.31646	0.396667	1.31646	up	0.000300099	0.00256453
56911	MAP3K7CL	MAP3K7 C-terminal like	5.88445	5.72663	5.70419	5.31074	5.30344	5.46186	-1.33152	-0.413077	1.33152	down	4.50988e-05	0.000563112
56946	EMSY	EMSY, BRCA2-interacting transcriptional repressor	4.57975	4.60827	4.47862	5.04084	5.05052	5.01618	1.39503	0.4803	1.39503	up	7.24242e-06	0.00013198
357	SHROOM2	shroom family member 2	4.89312	4.94984	4.99171	5.33615	5.3348	5.36268	1.31919	0.399653	1.31919	up	2.44851e-05	0.000346775
93183	PIGM	phosphatidylinositol glycan anchor biosynthesis class M	6.04423	5.9293	5.90765	5.48845	5.5239	5.64231	-1.32762	-0.40884	1.32762	down	2.03981e-05	0.000299011
7804	LRP8	LDL receptor related protein 8	7.32389	7.32365	7.31478	6.79042	6.86297	6.94165	-1.37151	-0.45576	1.37151	down	1.2239e-07	5.65176e-06
122553	TRAPPC6B	trafficking protein particle complex 6B	6.99096	6.9685	6.94464	7.34075	7.43686	7.47054	1.36416	0.448017	1.36416	up	9.95796e-08	4.86087e-06
9249	DHRS3	dehydrogenase/reductase (SDR family) member 3	4.02312	3.86342	4.08235	4.32771	4.40682	4.42104	1.31545	0.39556	1.31545	up	0.000224042	0.00202972
51148	CERCAM	cerebral endothelial cell adhesion molecule	5.8039	5.90419	5.85277	6.20702	6.2795	6.39727	1.35752	0.440977	1.35752	up	4.98393e-06	9.90843e-05
6809	STX3	syntaxin 3	6.98908	7.10086	7.08392	6.6446	6.57221	6.68372	-1.34205	-0.424443	1.34205	down	6.64557e-07	2.0867e-05
406991	MIR21	microRNA 21	8.07476	8.02119	8.0493	8.65712	8.6377	8.59013	1.49475	0.5799	1.49475	up	6.37104e-11	1.87061e-08
6310	ATXN1	ataxin 1	5.22847	5.20792	5.18618	5.57063	5.6941	5.69392	1.36165	0.44536	1.36165	up	6.58355e-06	0.000122889
147657	ZNF480	zinc finger protein 480	7.19388	7.26857	7.27769	6.7663	6.87378	6.94618	-1.30552	-0.384627	1.30552	down	2.91161e-06	6.46104e-05
282679	AQP11	aquaporin 11	2.99702	3.50888	3.38794	3.6952	3.75287	3.70483	1.33764	0.419687	1.33764	up	0.00210581	0.0121056
1958	EGR1	early growth response 1	5.19086	5.08895	5.44649	5.82497	5.8919	5.59493	1.44243	0.5285	1.44243	up	6.76929e-05	0.000780571
6709	SPTAN1	spectrin, alpha, non-erythrocytic 1	6.08541	6.1819	6.21317	6.59266	6.63854	6.63242	1.37654	0.461047	1.37654	up	4.93423e-07	1.64771e-05
1857	DVL3	dishevelled segment polarity protein 3	7.05387	7.08478	7.04571	7.55295	7.599	7.52768	1.41267	0.498423	1.41267	up	6.32319e-09	5.96594e-07
1230	CCR1	chemokine (C-C motif) receptor 1	4.26343	4.32169	3.74135	3.53259	3.66315	3.57239	-1.43341	-0.519447	1.43341	down	0.000913416	0.00622401
9618	TRAF4	TNF receptor associated factor 4	7.85693	7.90512	7.89907	8.32377	8.25982	8.28718	1.32245	0.403217	1.32245	up	1.26133e-08	9.97907e-07
6542	SLC7A2	solute carrier family 7 (cationic amino acid transporter, y+ system), member 2	6.43503	6.41551	6.39397	5.68214	5.65595	5.7466	-1.64711	-0.71994	1.64711	down	2.64925e-09	3.07469e-07
140890	SREK1	splicing regulatory glutamine/lysine-rich protein 1	7.32847	7.30845	7.21843	6.89571	6.95174	6.76532	-1.33255	-0.414193	1.33255	down	1.87657e-06	4.58583e-05
120526	DNAJC24	DnaJ heat shock protein family (Hsp40) member C24	6.36965	6.45738	6.4732	5.71032	5.55519	5.71522	-1.70902	-0.773167	1.70902	down	5.30155e-09	5.32102e-07
9699	RIMS2	regulating synaptic membrane exocytosis 2	7.6246	7.6095	7.61068	8.02896	8.0247	8.11617	1.35819	0.441683	1.35819	up	1.15327e-08	9.43185e-07
120114	FAT3	FAT atypical cadherin 3	5.08856	5.07439	5.21686	5.64183	5.66142	5.79504	1.48744	0.572827	1.48744	up	9.57269e-07	2.75514e-05
65983	GRAMD3	GRAM domain containing 3	7.93478	7.97967	7.87249	8.51971	8.45738	8.52535	1.48641	0.571833	1.48641	up	3.46661e-10	6.81542e-08
5738	PTGFRN	prostaglandin F2 receptor inhibitor	5.77789	5.69327	5.76084	5.06179	5.12674	4.97077	-1.61429	-0.6909	1.61429	down	5.37008e-08	2.95911e-06
4436	MSH2	mutS homolog 2	8.90102	8.77168	8.70464	8.26905	8.10524	8.29283	-1.4846	-0.570073	1.4846	down	3.50794e-08	2.09751e-06
1259	CNGA1	cyclic nucleotide gated channel alpha 1	3.47986	3.41203	3.28869	3.77784	3.80332	3.96067	1.3696	0.45375	1.3696	up	0.000110128	0.00115575
29128	UHRF1	ubiquitin-like with PHD and ring finger domains 1	7.87154	7.89294	7.95799	6.91163	6.98374	6.89593	-1.96845	-0.977057	1.96845	down	1.43527e-12	1.35442e-09
5343	PLGLB1	plasminogen-like B1	4.05571	4.13341	3.99902	4.45696	4.58787	4.28594	1.30213	0.380877	1.30213	up	0.000621597	0.00456868
9582	APOBEC3B	apolipoprotein B mRNA editing enzyme, catalytic polypeptide-like 3B	8.37297	8.4041	8.19668	8.00993	7.79281	7.92496	-1.33362	-0.41535	1.33362	down	4.53407e-06	9.18581e-05
59345	GNB4	guanine nucleotide binding protein (G protein), beta polypeptide 4	4.93589	4.92264	4.81654	5.30264	5.2518	5.43228	1.35399	0.437217	1.35399	up	2.9583e-05	0.000405103
100137047	JMJD7	jumonji domain containing 7	4.89543	5.00199	4.99303	4.48291	4.76251	4.3245	-1.35677	-0.440177	1.35677	down	0.000466486	0.00363362
10013	HDAC6	histone deacetylase 6	4.70168	4.65538	4.72395	5.13806	5.01822	5.13824	1.32363	0.404503	1.32363	up	4.40824e-05	0.000553937
402778	IFITM10	interferon induced transmembrane protein 10	5.31074	5.47335	5.57359	6.1085	5.9837	6.1229	1.53596	0.61914	1.53596	up	6.84756e-07	2.13988e-05
56681	SAR1A	secretion associated, Ras related GTPase 1A	7.59719	7.72641	7.83665	7.1685	7.26075	7.20978	-1.42116	-0.507073	1.42116	down	2.01314e-07	8.2521e-06
10449	ACAA2	acetyl-CoA acyltransferase 2	7.6504	7.54133	7.58998	7.11605	7.24243	7.21867	-1.3209	-0.40152	1.3209	down	4.85813e-07	1.62809e-05
146223	CMTM4	CKLF-like MARVEL transmembrane domain containing 4	7.61463	7.64048	7.507	7.09114	7.11211	7.16794	-1.37902	-0.46364	1.37902	down	6.98777e-08	3.64435e-06
4217	MAP3K5	mitogen-activated protein kinase kinase kinase 5	6.47525	6.43474	6.53565	6.84689	6.96424	6.91768	1.34511	0.427723	1.34511	up	7.20443e-07	2.23321e-05
5217	PFN2	profilin 2	5.11576	5.38796	5.26589	4.87536	4.94195	4.71498	-1.33093	-0.41244	1.33093	down	0.000238846	0.00213815
340719	NANOS1	nanos homolog 1 (Drosophila)	8.52246	8.56889	8.53367	9.24787	9.23379	9.26923	1.63424	0.708623	1.63424	up	5.59256e-13	7.21009e-10
388272	C16orf87	chromosome 16 open reading frame 87	6.67654	6.77823	6.64892	7.2603	7.07403	7.13138	1.36984	0.454007	1.36984	up	1.02826e-06	2.9126e-05
34	ACADM	acyl-CoA dehydrogenase, C-4 to C-12 straight chain	6.40514	6.53424	6.35884	5.54372	5.34814	5.72055	-1.85996	-0.89527	1.85996	down	3.53108e-08	2.10495e-06
11339	OIP5	Opa interacting protein 5	8.2667	8.31392	8.29722	7.65962	7.74881	7.79285	-1.4731	-0.558853	1.4731	down	1.01595e-09	1.5027e-07
8970	HIST1H2BJ	histone cluster 1, H2bj	4.59474	4.58441	4.63234	5.04283	5.07031	5.05692	1.36875	0.452857	1.36875	up	8.29003e-06	0.000146656
55163	PNPO	pyridoxamine 5'-phosphate oxidase	5.44802	5.47664	5.37832	4.54545	4.74575	4.65496	-1.72382	-0.785607	1.72382	down	3.41078e-08	2.06675e-06
57563	KLHL8	kelch like family member 8	6.03862	5.83169	6.03657	5.2082	5.61632	5.51908	-1.43504	-0.521093	1.43504	down	7.18182e-05	0.000817596
2885	GRB2	growth factor receptor bound protein 2	9.94404	9.99753	10.0994	9.62097	9.6658	9.60694	-1.30352	-0.38241	1.30352	down	2.68322e-08	1.72748e-06
114789	SLC25A25	solute carrier family 25 (mitochondrial carrier; phosphate carrier), member 25	7.26414	7.40589	7.34615	7.75941	7.73473	7.7574	1.33033	0.411787	1.33033	up	1.36347e-07	6.17021e-06
50626	CYHR1	cysteine/histidine-rich 1	5.6716	5.74689	5.71556	6.16559	6.23841	6.10659	1.37444	0.458847	1.37444	up	1.71457e-06	4.27491e-05
55214	P3H2	prolyl 3-hydroxylase 2	8.84065	8.86881	8.90244	9.24888	9.33916	9.31399	1.34727	0.430043	1.34727	up	1.56516e-09	2.04584e-07
58538	MPP4	membrane protein, palmitoylated 4	4.64743	5.05736	4.96698	5.50218	5.70886	5.95169	1.77808	0.83032	1.77808	up	3.83587e-06	8.01904e-05
23266	ADGRL2	adhesion G protein-coupled receptor L2	4.58922	4.61316	4.61923	5.10529	4.98653	5.23204	1.41495	0.50075	1.41495	up	1.17634e-05	0.000193181
151242	PPP1R1C	protein phosphatase 1 regulatory inhibitor subunit 1C	3.96243	4.03835	3.9235	4.39525	4.34656	4.38127	1.31914	0.3996	1.31914	up	8.69067e-05	0.000954566
130502	TTC32	tetratricopeptide repeat domain 32	6.7103	6.7769	6.70261	7.19643	7.09197	7.25672	1.36772	0.45177	1.36772	up	3.70715e-07	1.33246e-05
8681	JMJD7-PLA2G4B	JMJD7-PLA2G4B readthrough	4.89543	5.00199	4.99303	4.48291	4.76251	4.3245	-1.35677	-0.440177	1.35677	down	0.000466486	0.00363362
667	DST	dystonin	6.70822	6.71397	6.70822	7.12016	7.2985	7.29596	1.442	0.52807	1.442	up	7.89286e-08	4.02018e-06
1602	DACH1	dachshund family transcription factor 1	3.88774	4.04385	3.87591	4.18511	4.47654	4.40049	1.33627	0.418213	1.33627	up	0.00036405	0.0029921
8482	SEMA7A	semaphorin 7A, GPI membrane anchor (John Milton Hagen blood group)	4.26454	4.1928	4.76741	5.11146	5.21042	5.03892	1.63809	0.712017	1.63809	up	3.61697e-05	0.000474196
51029	DESI2	desumoylating isopeptidase 2	9.36337	9.36342	9.393	8.62941	8.67285	8.69831	-1.63173	-0.706407	1.63173	down	7.02898e-13	8.38025e-10
1371	CPOX	coproporphyrinogen oxidase	7.18346	7.11329	7.32305	6.75896	6.84006	6.78159	-1.33151	-0.413063	1.33151	down	2.45461e-06	5.64762e-05
26118	WSB1	WD repeat and SOCS box containing 1	4.09597	4.17513	4.24048	3.67996	3.73868	3.83205	-1.3382	-0.420297	1.3382	down	0.000109225	0.0011478
10559	SLC35A1	solute carrier family 35 (CMP-sialic acid transporter), member A1	6.11184	6.05424	6.16084	5.65912	5.64413	5.75815	-1.33964	-0.42184	1.33964	down	5.61351e-06	0.000108636
79650	USB1	U6 snRNA biogenesis 1	5.87883	5.88173	5.9121	5.09381	5.28405	5.01693	-1.69266	-0.75929	1.69266	down	5.28544e-08	2.92888e-06
29761	USP25	ubiquitin specific peptidase 25	5.24252	5.04593	5.12211	4.60887	4.71998	4.52219	-1.4338	-0.51984	1.4338	down	1.11579e-05	0.000185308
6049	RNF6	ring finger protein (C3H2C3 type) 6	6.53128	6.38336	6.61583	5.78924	5.75025	5.79615	-1.66049	-0.73161	1.66049	down	1.42241e-08	1.08878e-06
2730	GCLM	glutamate-cysteine ligase, modifier subunit	9.82773	9.8225	9.7709	9.29635	9.19185	9.3057	-1.4564	-0.54241	1.4564	down	1.13885e-10	2.96128e-08
84002	B3GNT5	UDP-GlcNAc:betaGal beta-1,3-N-acetylglucosaminyltransferase 5	5.34622	5.26579	5.22029	4.82652	4.7529	5.02373	-1.32842	-0.409717	1.32842	down	0.00014205	0.0014154
652995	UCA1	urothelial cancer associated 1 (non-protein coding)	8.03004	7.98524	8.04183	8.87573	8.83484	8.86121	1.78785	0.838223	1.78785	up	2.28045e-13	3.73842e-10
54813	KLHL28	kelch like family member 28	3.73735	3.80847	3.76014	4.07425	4.1282	4.43576	1.36045	0.444083	1.36045	up	0.000336795	0.00280739
7296	TXNRD1	thioredoxin reductase 1	10.0007	9.98972	10.0202	9.29668	9.39257	9.38278	-1.56502	-0.64618	1.56502	down	2.2524e-12	2.01405e-09
3183	HNRNPC	heterogeneous nuclear ribonucleoprotein C (C1/C2)	6.32631	6.25799	6.41817	6.6606	6.71456	6.79723	1.31037	0.389973	1.31037	up	7.69421e-06	0.000138229
7857	SCG2	secretogranin II	4.45051	4.63811	4.71194	5.16423	5.01565	5.24437	1.45521	0.54123	1.45521	up	1.80715e-05	0.000270652
129285	PPP1R21	protein phosphatase 1 regulatory subunit 21	5.25138	5.36413	5.3228	4.96869	4.75742	5.02077	-1.3169	-0.397143	1.3169	down	0.000170768	0.00163154
10492	SYNCRIP	synaptotagmin binding, cytoplasmic RNA interacting protein	7.5635	7.54008	7.2934	6.92366	6.95967	7.06785	-1.39661	-0.481933	1.39661	down	3.06078e-06	6.71631e-05
84886	C1orf198	chromosome 1 open reading frame 198	8.32186	8.28967	8.35454	7.7292	7.67024	7.70221	-1.53845	-0.621473	1.53845	down	5.6312e-11	1.73089e-08
898	CCNE1	cyclin E1	7.90574	7.85606	7.92198	7.40904	7.38772	7.4234	-1.40238	-0.487873	1.40238	down	2.96089e-09	3.34751e-07
49856	WRAP73	WD repeat containing, antisense to TP73	7.18346	7.11045	7.14976	6.65774	6.71671	6.58771	-1.40818	-0.493837	1.40818	down	6.68724e-08	3.54109e-06
1024	CDK8	cyclin-dependent kinase 8	8.57515	8.69162	8.57154	8.11525	8.18215	8.2222	-1.3562	-0.43957	1.3562	down	3.01109e-08	1.87154e-06
51014	TMED7	transmembrane p24 trafficking protein 7	8.24957	8.23272	8.28815	7.5735	7.55317	7.63205	-1.59171	-0.670573	1.59171	down	3.33463e-11	1.29899e-08
375346	TMEM110	transmembrane protein 110	6.08466	5.95411	6.11662	5.58185	5.62145	5.67781	-1.34235	-0.42476	1.34235	down	8.93241e-06	0.000155779
11009	IL24	interleukin 24	6.0147	6.22381	6.13691	5.34741	5.42015	5.43853	-1.65074	-0.72311	1.65074	down	3.0053e-08	1.87089e-06
8089	YEATS4	YEATS domain containing 4	8.81347	8.8547	8.68391	7.9522	7.82099	7.98142	-1.82238	-0.865823	1.82238	down	4.8444e-11	1.54958e-08
23390	ZDHHC17	zinc finger, DHHC-type containing 17	5.08856	5.03312	5.11749	4.73827	4.67297	4.68921	-1.30096	-0.379573	1.30096	down	6.20068e-05	0.000727585
1948	EFNB2	ephrin-B2	7.07764	7.19589	6.996	7.60219	7.64357	7.52948	1.41608	0.501903	1.41608	up	1.46029e-07	6.54369e-06
3005	H1F0	H1 histone family member 0	9.29561	9.37998	9.27013	8.75038	8.73328	9.08782	-1.37371	-0.45808	1.37371	down	1.13146e-05	0.000187043
55366	LGR4	leucine-rich repeat containing G protein-coupled receptor 4	6.68097	6.71229	6.54834	7.03939	6.94927	7.09125	1.30083	0.379437	1.30083	up	7.78902e-06	0.000139538
11078	TRIOBP	TRIO and F-actin binding protein	6.0597	5.89831	5.92576	6.41545	6.45483	6.4395	1.39024	0.475337	1.39024	up	8.98902e-07	2.62928e-05
57181	SLC39A10	solute carrier family 39 (zinc transporter), member 10	6.44621	6.52324	6.62478	6.1077	6.06904	6.18078	-1.33075	-0.412237	1.33075	down	6.13775e-06	0.000116546
51274	KLF3	Kruppel-like factor 3 (basic)	5.79537	5.82263	5.98164	6.39104	6.41631	6.3764	1.44197	0.528037	1.44197	up	4.59793e-07	1.57032e-05
91624	NEXN	nexilin (F actin binding protein)	5.73666	5.95289	5.75552	6.39149	6.30663	6.32559	1.44014	0.526213	1.44014	up	1.21167e-06	3.30138e-05
8544	PIR	pirin	6.84697	6.9361	6.89862	6.0006	6.14684	6.28823	-1.68025	-0.748673	1.68025	down	1.78598e-08	1.28708e-06
1345	COX6C	cytochrome c oxidase subunit VIc	11.5964	11.5114	11.5576	10.6901	10.6294	10.6702	-1.85566	-0.89193	1.85566	down	2.91597e-15	1.9121e-11
5272	SERPINB9	serpin peptidase inhibitor, clade B (ovalbumin), member 9	8.39027	8.3665	8.37732	8.80472	8.8155	8.83538	1.35708	0.440503	1.35708	up	4.96777e-10	8.92475e-08
166378	SPATA5	spermatogenesis associated 5	6.42245	6.37677	6.29148	5.98658	5.75279	6.14594	-1.32115	-0.401797	1.32115	down	0.000232473	0.00209108
55010	PARPBP	PARP1 binding protein	4.51508	4.51874	4.36003	4.04702	3.88935	4.01887	-1.3943	-0.479537	1.3943	down	3.3053e-05	0.000441125
3070	HELLS	helicase, lymphoid-specific	7.18221	6.98074	6.95906	6.53953	6.57392	6.67356	-1.36131	-0.445	1.36131	down	4.17561e-06	8.60132e-05
80345	ZSCAN16	zinc finger and SCAN domain containing 16	5.43802	5.66793	5.66909	5.94932	5.9671	6.08095	1.32633	0.407443	1.32633	up	6.14828e-05	0.000722083
378938	MALAT1	metastasis associated lung adenocarcinoma transcript 1 (non-protein coding)	8.01778	8.03403	7.9815	8.39835	8.37731	8.42413	1.30933	0.388827	1.30933	up	1.19503e-08	9.69426e-07
10962	MLLT11	myeloid/lymphoid or mixed-lineage leukemia; translocated to, 11	7.69103	7.628	7.67273	6.89645	6.95362	7.09587	-1.6043	-0.68194	1.6043	down	1.98431e-09	2.43971e-07
56916	SMARCAD1	SWI/SNF-related, matrix-associated actin-dependent regulator of chromatin, subfamily a, containing DEAD/H box 1	8.31808	8.41198	8.32998	7.96034	7.97041	7.94205	-1.31562	-0.395747	1.31562	down	2.36739e-08	1.57869e-06
51200	CPA4	carboxypeptidase A4	7.54322	7.51136	7.61049	8.17177	8.16838	8.20967	1.54569	0.62825	1.54569	up	1.20441e-10	3.07704e-08
5825	ABCD3	ATP binding cassette subfamily D member 3	6.30139	6.45714	6.42126	5.93881	5.94382	6.07858	-1.32518	-0.406193	1.32518	down	1.17749e-05	0.000193191
51304	ZDHHC3	zinc finger, DHHC-type containing 3	6.1319	6.14191	6.38047	6.69295	6.67148	6.65379	1.37045	0.454647	1.37045	up	5.81256e-06	0.000111268
5021	OXTR	oxytocin receptor	3.67222	3.67652	3.60495	4.05554	4.26488	4.09891	1.40303	0.488547	1.40303	up	3.08532e-05	0.000417144
7538	ZFP36	ZFP36 ring finger protein	8.56689	8.59514	8.63436	9.02355	9.04653	9.06966	1.36394	0.447783	1.36394	up	5.87874e-10	1.00548e-07
135114	HINT3	histidine triad nucleotide binding protein 3	4.85695	4.93343	4.93172	4.39957	4.22552	4.51323	-1.44186	-0.527927	1.44186	down	1.52767e-05	0.000236818
4879	NPPB	natriuretic peptide B	7.44038	7.53196	7.51518	8.14591	8.16155	8.17088	1.58404	0.663607	1.58404	up	4.97598e-11	1.5662e-08
23507	LRRC8B	leucine-rich repeat containing 8 family member B	5.24362	5.29417	5.39125	4.76419	4.62078	4.45938	-1.61877	-0.694897	1.61877	down	8.06065e-07	2.41537e-05
26579	MYEOV	myeloma overexpressed	8.92631	8.96874	9.02643	8.57196	8.51468	8.56476	-1.34105	-0.42336	1.34105	down	4.24482e-09	4.47743e-07
9308	CD83	CD83 molecule	7.50141	7.56976	7.60036	6.62956	6.66232	6.77447	-1.82563	-0.868393	1.82563	down	5.20206e-11	1.61157e-08
51316	PLAC8	placenta specific 8	10.0964	10.1114	10.1157	10.5254	10.5047	10.5239	1.32884	0.410163	1.32884	up	2.08462e-11	9.4273e-09
126068	ZNF441	zinc finger protein 441	4.52512	4.32991	4.51835	4.83461	4.88922	4.79544	1.30311	0.381963	1.30311	up	0.000206053	0.00189858
8091	HMGA2	high mobility group AT-hook 2	8.07319	8.042	8.08229	8.7179	8.75463	8.8014	1.61569	0.69215	1.61569	up	5.76978e-12	3.81976e-09
51503	CWC15	CWC15 spliceosome-associated protein	5.42827	5.50922	5.58067	5.12109	5.10126	5.0388	-1.337	-0.419003	1.337	down	2.06732e-05	0.000301693
10672	GNA13	guanine nucleotide binding protein (G protein), alpha 13	4.45393	4.38539	4.58142	3.96978	3.86354	3.9699	-1.45314	-0.539173	1.45314	down	8.47099e-06	0.000149253
143279	HECTD2	HECT domain containing E3 ubiquitin protein ligase 2	5.87358	5.9574	5.92452	5.28751	5.37214	5.28939	-1.51798	-0.602153	1.51798	down	1.04381e-07	5.02782e-06
81488	POLR2M	polymerase (RNA) II (DNA directed) polypeptide M	8.15427	8.22848	8.26176	7.72888	7.73576	7.77683	-1.38288	-0.46768	1.38288	down	6.02239e-09	5.77914e-07
200315	APOBEC3A	apolipoprotein B mRNA editing enzyme, catalytic polypeptide-like 3A	8.37297	8.4041	8.19668	8.00993	7.79281	7.92496	-1.33362	-0.41535	1.33362	down	4.53407e-06	9.18581e-05
219902	TMEM136	transmembrane protein 136	5.93647	5.98878	6.11585	5.1164	5.19872	5.28092	-1.75932	-0.81502	1.75932	down	1.13431e-08	9.35574e-07
57589	RIC1	RIC1 homolog, RAB6A GEF complex partner 1	4.5357	4.61698	4.29616	4.89138	5.23709	4.97319	1.46504	0.55094	1.46504	up	8.20332e-05	0.000911984
6309	SC5D	sterol-C5-desaturase	7.28276	7.26613	7.3098	6.7933	6.74808	6.9467	-1.37256	-0.45687	1.37256	down	4.75364e-07	1.60233e-05
1646	AKR1C2	aldo-keto reductase family 1, member C2	5.21331	5.25841	5.1156	4.3649	4.29314	4.07247	-1.93491	-0.95227	1.93491	down	2.07037e-08	1.44171e-06
10231	RCAN2	regulator of calcineurin 2	4.76606	4.7075	4.97435	4.41548	4.49079	4.34637	-1.31807	-0.398423	1.31807	down	0.00028963	0.00248966
56998	CTNNBIP1	catenin beta interacting protein 1	7.12457	7.11984	7.31765	7.55922	7.58337	7.5778	1.30686	0.38611	1.30686	up	2.77794e-06	6.23476e-05
5796	PTPRK	protein tyrosine phosphatase, receptor type, K	5.54783	5.31074	5.42071	6.06357	6.04492	6.26334	1.62171	0.697517	1.62171	up	2.74685e-07	1.05746e-05
5342	PLGLB2	plasminogen-like B2	4.05571	4.13341	3.99902	4.45696	4.58787	4.28594	1.30213	0.380877	1.30213	up	0.000621597	0.00456868
627	BDNF	brain-derived neurotrophic factor	6.14889	6.2438	6.23145	6.61478	6.62393	6.64509	1.33782	0.419887	1.33782	up	8.92191e-07	2.61373e-05
11030	RBPMS	RNA binding protein with multiple splicing	3.5462	3.74689	3.99195	4.22589	4.34139	4.35047	1.45825	0.544237	1.45825	up	0.000100519	0.00107176
9510	ADAMTS1	ADAM metallopeptidase with thrombospondin type 1 motif 1	5.99301	6.06239	5.9299	6.55496	6.51782	6.44414	1.42458	0.51054	1.42458	up	3.24745e-07	1.20309e-05
347862	PDDC1	Parkinson disease 7 domain containing 1	5.24519	5.4801	5.48646	5.7925	5.93066	5.77194	1.34517	0.427783	1.34517	up	6.37299e-05	0.000743591
221662	RBM24	RNA binding motif protein 24	7.39015	7.42251	7.29484	7.83555	7.80626	7.89865	1.39248	0.477653	1.39248	up	2.91046e-08	1.8263e-06
27327	TNRC6A	trinucleotide repeat containing 6A	7.2779	7.32327	7.29004	7.78344	7.72038	7.86043	1.40543	0.491013	1.40543	up	1.61123e-08	1.1849e-06
283537	SLC46A3	solute carrier family 46, member 3	6.36023	6.2424	6.32452	6.631	6.77352	6.82897	1.35233	0.435447	1.35233	up	3.54468e-06	7.53849e-05
54014	BRWD1	bromodomain and WD repeat domain containing 1	4.42401	4.05767	4.18923	3.79572	3.55575	3.75614	-1.43505	-0.5211	1.43505	down	0.000133374	0.00134516
8428	STK24	serine/threonine kinase 24	5.20089	5.37601	5.48164	5.85858	5.72581	5.68701	1.32343	0.404287	1.32343	up	0.000136887	0.0013725
1910	EDNRB	endothelin receptor type B	7.09854	7.10533	7.07359	7.60398	7.48839	7.76323	1.43998	0.526047	1.43998	up	2.52359e-07	9.87942e-06
29126	CD274	CD274 molecule	5.15445	5.02964	5.36491	5.52081	5.62299	5.70488	1.35025	0.433227	1.35025	up	0.000152953	0.0014951
5734	PTGER4	prostaglandin E receptor 4	7.2751	7.37965	7.32727	7.71772	7.81097	7.80882	1.36777	0.45183	1.36777	up	4.66393e-08	2.62295e-06
64743	WDR13	WD repeat domain 13	7.19167	7.15807	7.2905	7.59848	7.63615	7.56699	1.30779	0.387127	1.30779	up	4.74648e-07	1.60233e-05
57095	PITHD1	PITH (C-terminal proteasome-interacting domain of thioredoxin-like) domain containing 1	8.68112	8.72443	8.80497	7.75213	7.89499	7.76376	-1.90952	-0.933213	1.90952	down	4.28901e-12	3.19915e-09
285172	FAM126B	family with sequence similarity 126 member B	5.37436	5.40276	5.43926	5.75661	5.78359	5.888	1.32312	0.40394	1.32312	up	1.43552e-05	0.000226278
158135	TTLL11	tubulin tyrosine ligase like11	4.82574	5.03061	4.95642	5.20355	5.34839	5.49506	1.32999	0.41141	1.32999	up	0.000223641	0.00202787
162394	SLFN5	schlafen family member 5	4.98582	5.06269	5.24278	4.74407	4.62898	4.63024	-1.34661	-0.429333	1.34661	down	9.41727e-05	0.00101985
26049	FAM169A	family with sequence similarity 169 member A	6.57101	6.65542	6.61493	5.67471	5.61033	5.83183	-1.87665	-0.908163	1.87665	down	8.65926e-10	1.33082e-07
28982	FLVCR1	feline leukemia virus subgroup C cellular receptor 1	5.33023	5.28193	5.29201	4.79435	5.00897	4.87563	-1.32722	-0.408407	1.32722	down	5.73121e-05	0.000682059
55086	CXorf57	chromosome X open reading frame 57	3.81333	3.8568	3.77006	3.4268	2.91451	3.35043	-1.49777	-0.582817	1.49777	down	0.000156516	0.00151936
3678	ITGA5	integrin alpha 5	7.36716	7.42989	7.47323	7.78423	7.87154	7.78806	1.31147	0.391183	1.31147	up	2.21312e-07	8.83095e-06
9270	ITGB1BP1	integrin beta 1 binding protein 1	7.08545	7.05068	6.98517	6.65281	6.57733	6.66331	-1.32803	-0.409283	1.32803	down	6.50362e-07	2.0536e-05
203228	C9orf72	chromosome 9 open reading frame 72	4.09987	4.29116	4.09005	3.83264	3.78834	3.40843	-1.39851	-0.48389	1.39851	down	0.000506782	0.00387933
257194	NEGR1	neuronal growth regulator 1	5.77762	5.83249	5.71575	6.06302	6.20641	6.21459	1.30681	0.386053	1.30681	up	2.22826e-05	0.000321484
4726	NDUFS6	NADH:ubiquinone oxidoreductase subunit S6	10.4366	10.4114	10.4655	9.83477	9.86559	9.83782	-1.50707	-0.591747	1.50707	down	5.23311e-13	7.0997e-10
8828	NRP2	neuropilin 2	6.60014	6.72302	6.58533	6.95252	7.10529	7.05207	1.31993	0.400463	1.31993	up	3.57514e-06	7.58766e-05
81888	HYI	hydroxypyruvate isomerase (putative)	9.63686	9.67718	9.69791	10.0222	10.0723	10.0579	1.30147	0.380147	1.30147	up	6.58811e-10	1.08453e-07
79971	WLS	wntless Wnt ligand secretion mediator	5.8466	6.0858	6.16086	6.4951	6.52132	6.5249	1.39734	0.482687	1.39734	up	8.49599e-06	0.00014956
286148	DPY19L4	dpy-19-like 4 (C. elegans)	5.60042	5.54927	5.54285	4.94877	5.07488	5.17103	-1.41351	-0.499287	1.41351	down	5.59982e-06	0.000108478
27338	UBE2S	ubiquitin conjugating enzyme E2S	11.2552	11.2157	11.2591	10.5944	10.642	10.6146	-1.54366	-0.626353	1.54366	down	7.02776e-14	1.72813e-10
2820	GPD2	glycerol-3-phosphate dehydrogenase 2	5.78827	5.92562	5.8416	5.50811	5.42395	5.45166	-1.31093	-0.39059	1.31093	down	2.06719e-05	0.000301693
8202	NCOA3	nuclear receptor coactivator 3	7.15182	7.20574	6.99731	7.50428	7.50122	7.53319	1.31458	0.394607	1.31458	up	1.9891e-06	4.79529e-05
201973	PRIMPOL	primase and DNA directed polymerase	6.69942	6.60196	6.63125	6.13552	6.07985	6.32311	-1.38005	-0.464717	1.38005	down	3.97793e-06	8.27645e-05
221035	REEP3	receptor accessory protein 3	6.25472	6.31332	5.9971	6.80189	6.60409	6.8056	1.46288	0.548813	1.46288	up	6.36076e-06	0.000119569
154743	C7orf60	chromosome 7 open reading frame 60	6.31007	6.29055	6.36304	6.8121	6.77977	6.80157	1.39145	0.476593	1.39145	up	9.73868e-08	4.77785e-06
408186	OVOS	ovostatin	6.13823	6.19743	6.36058	5.57059	5.44598	5.72858	-1.56956	-0.650363	1.56956	down	8.24711e-07	2.46374e-05
1075	CTSC	cathepsin C	6.58533	6.49208	6.35715	6.12872	5.93092	5.99953	-1.37408	-0.458463	1.37408	down	1.01128e-05	0.000172017
6726	SRP9	signal recognition particle 9kDa	10.0156	10.0782	10.0532	9.186	9.24579	9.28456	-1.75348	-0.81022	1.75348	down	1.47702e-13	2.5266e-10
57214	CEMIP	cell migration inducing protein, hyaluronan binding	6.60027	6.52609	6.54767	6.92499	6.9741	6.98349	1.32212	0.40285	1.32212	up	5.27416e-07	1.73646e-05
51805	COQ3	coenzyme Q3 methyltransferase	7.09214	6.98416	7.09977	6.70304	6.77703	6.54127	-1.30578	-0.38491	1.30578	down	1.60613e-05	0.000246169
19	ABCA1	ATP binding cassette subfamily A member 1	6.62728	6.57558	6.62909	7.27503	7.22006	7.30986	1.57753	0.657667	1.57753	up	7.37337e-10	1.18942e-07
63894	VIPAS39	VPS33B interacting protein, apical-basolateral polarity regulator, spe-39 homolog	5.78195	5.8201	5.97342	5.37536	5.46697	5.42488	-1.35293	-0.436087	1.35293	down	1.31532e-05	0.00021131
1836	SLC26A2	solute carrier family 26 (anion exchanger), member 2	6.16513	6.18039	6.1848	5.59712	5.88199	5.71218	-1.36258	-0.446343	1.36258	down	1.55874e-05	0.000240686
5819	PVRL2	poliovirus receptor-related 2 (herpesvirus entry mediator B)	9.12246	9.05215	9.15614	9.50436	9.62382	9.55269	1.36608	0.45004	1.36608	up	3.84331e-09	4.13145e-07
27079	RPUSD2	RNA pseudouridylate synthase domain containing 2	5.96752	5.7793	5.98355	5.18406	5.23333	5.37588	-1.5645	-0.6457	1.5645	down	5.04643e-07	1.6755e-05
100913187	APOBEC3A_B	APOBEC3A and APOBEC3B deletion hybrid	8.37297	8.4041	8.19668	8.00993	7.79281	7.92496	-1.33362	-0.41535	1.33362	down	4.53407e-06	9.18581e-05
57724	EPG5	ectopic P-granules autophagy protein 5 homolog (C. elegans)	6.63939	6.80223	6.86456	7.20965	7.19914	7.26857	1.37274	0.45706	1.37274	up	1.04708e-06	2.95526e-05
6936	GCFC2	GC-rich sequence DNA-binding factor 2	6.40618	6.54932	6.65379	6.04294	6.091	6.19359	-1.34467	-0.427253	1.34467	down	1.5809e-05	0.000243631
1121	CHM	choroideremia (Rab escort protein 1)	3.71196	3.92551	3.98593	3.39197	3.30322	3.60062	-1.35899	-0.44253	1.35899	down	0.000489913	0.0037787
254887	ZDHHC23	zinc finger, DHHC-type containing 23	4.41371	4.46643	4.61063	4.00751	4.11834	4.05913	-1.35216	-0.435263	1.35216	down	7.36153e-05	0.000833473
64089	SNX16	sorting nexin 16	3.56163	3.65562	3.55066	3.92521	3.93418	4.06655	1.30677	0.38601	1.30677	up	0.000244155	0.00217479
5019	OXCT1	3-oxoacid CoA-transferase 1	6.27597	6.28069	6.30435	5.79791	5.59565	5.96593	-1.41471	-0.500507	1.41471	down	1.52253e-05	0.000236208
1677	DFFB	DNA fragmentation factor, 40kDa, beta polypeptide (caspase-activated DNase)	3.76523	3.69249	3.96416	3.16327	3.36904	3.39182	-1.41348	-0.49925	1.41348	down	0.000114197	0.00119114
214	ALCAM	activated leukocyte cell adhesion molecule	4.3368	4.52734	4.51955	4.88456	4.94005	4.75742	1.319	0.399447	1.319	up	0.000204775	0.00188858
6713	SQLE	squalene epoxidase	7.92599	7.98781	7.999	7.54271	7.41841	7.66076	-1.34752	-0.430307	1.34752	down	9.52141e-07	2.74641e-05
220213	OTUD1	OTU deubiquitinase 1	7.34221	7.4024	7.42313	7.89989	7.9222	7.94559	1.44725	0.533313	1.44725	up	1.2793e-09	1.77228e-07
11186	RASSF1	Ras association (RalGDS/AF-6) domain family member 1	8.04719	8.05015	8.0983	8.46399	8.50384	8.6256	1.38121	0.46593	1.38121	up	1.86119e-08	1.32417e-06
27314	RAB30	RAB30, member RAS oncogene family	5.51652	5.5605	5.63108	6.08702	6.07683	6.06004	1.41938	0.505263	1.41938	up	4.98756e-07	1.66016e-05
84515	MCM8	minichromosome maintenance 8 homologous recombination repair factor	8.16556	8.16262	8.19207	7.58088	7.6435	7.60974	-1.47636	-0.562043	1.47636	down	2.09456e-10	4.60381e-08
3189	HNRNPH3	heterogeneous nuclear ribonucleoprotein H3 (2H9)	9.90514	9.90299	9.79155	9.49275	9.43819	9.51614	-1.30514	-0.3842	1.30514	down	1.45323e-08	1.10378e-06
10370	CITED2	Cbp/p300-interacting transactivator, with Glu/Asp rich carboxy-terminal domain, 2	9.49724	9.53942	9.44748	9.97034	9.99711	10.0092	1.41176	0.49749	1.41176	up	4.75694e-11	1.54958e-08
10049	DNAJB6	DnaJ heat shock protein family (Hsp40) member B6	10.574	10.5538	10.5643	9.86519	9.92033	9.84931	-1.60854	-0.685753	1.60854	down	1.00354e-13	1.92843e-10
79642	ARSJ	arylsulfatase family member J	5.66358	5.76003	5.82627	6.1712	6.1642	6.30936	1.38028	0.46496	1.38028	up	4.0634e-06	8.42754e-05
26175	TMEM251	transmembrane protein 251	8.08671	8.10725	8.15899	7.39331	7.47222	7.49869	-1.58327	-0.66291	1.58327	down	1.23248e-10	3.12843e-08
26148	C10orf12	chromosome 10 open reading frame 12	5.01486	4.98495	4.94026	5.33676	5.27184	5.51497	1.31449	0.3945	1.31449	up	0.000111928	0.00117151
10793	ZNF273	zinc finger protein 273	4.44135	4.70208	4.1476	3.88838	4.00293	4.13097	-1.34064	-0.422917	1.34064	down	0.00279208	0.0151332
57157	PHTF2	putative homeodomain transcription factor 2	6.12217	6.10252	6.10205	5.5292	5.28756	5.48025	-1.59834	-0.676577	1.59834	down	1.02472e-07	4.96508e-06
29887	SNX10	sorting nexin 10	6.00209	6.05022	5.9863	5.31503	5.31339	5.53124	-1.54362	-0.626317	1.54362	down	3.12615e-07	1.16916e-05
10468	FST	follistatin	5.76458	5.67213	6.03509	6.49581	6.55966	6.47201	1.60795	0.685227	1.60795	up	4.76088e-07	1.60233e-05
55075	UACA	uveal autoantigen with coiled-coil domains and ankyrin repeats	7.62859	7.66293	7.35189	8.04392	7.87769	7.88906	1.30956	0.389087	1.30956	up	6.11207e-05	0.000718689
9197	SLC33A1	solute carrier family 33 (acetyl-CoA transporter), member 1	6.04997	6.15748	6.1903	6.5649	6.52818	6.62259	1.35595	0.439307	1.35595	up	1.56245e-06	4.01259e-05
55432	YOD1	YOD1 deubiquitinase	8.14767	8.13766	8.08878	8.92881	8.82255	8.90776	1.69545	0.76167	1.69545	up	3.76552e-12	2.90492e-09
117854	TRIM6	tripartite motif containing 6	7.06463	7.13125	7.20348	7.68942	7.7224	7.7959	1.51865	0.602787	1.51865	up	2.93117e-09	3.34137e-07
80218	NAA50	N(alpha)-acetyltransferase 50, NatE catalytic subunit	7.43006	7.47636	7.52799	6.25176	6.33792	6.4285	-2.20189	-1.13874	2.20189	down	3.37558e-12	2.65617e-09
55300	PI4K2B	phosphatidylinositol 4-kinase type 2 beta	5.67984	5.77856	5.97745	5.31073	5.3263	5.3686	-1.3916	-0.47674	1.3916	down	1.78217e-05	0.000267625
138050	HGSNAT	heparan-alpha-glucosaminide N-acetyltransferase	5.18429	5.35705	5.24923	5.72022	5.72719	5.75539	1.38582	0.470743	1.38582	up	4.26102e-06	8.75891e-05
57381	RHOJ	ras homolog family member J	4.74631	4.84934	4.8598	4.29288	4.28371	4.47923	-1.38179	-0.466543	1.38179	down	3.48105e-05	0.000460519
1295	COL8A1	collagen, type VIII, alpha 1	8.64558	8.66914	8.6116	9.02427	9.04147	9.02252	1.30796	0.387313	1.30796	up	2.29689e-09	2.72196e-07
7980	TFPI2	tissue factor pathway inhibitor 2	3.56405	3.52228	3.46083	4.09098	4.10714	4.08345	1.49292	0.578137	1.49292	up	2.03791e-06	4.86527e-05
113130	CDCA5	cell division cycle associated 5	8.24689	8.17078	8.2435	7.8903	7.7475	7.77177	-1.33533	-0.4172	1.33533	down	1.0803e-07	5.17703e-06
158293	FAM120AOS	family with sequence similarity 120A opposite strand	6.44601	6.49029	6.44698	6.06751	5.89668	6.00804	-1.38545	-0.47035	1.38545	down	1.01112e-06	2.87568e-05
55165	CEP55	centrosomal protein 55kDa	9.2438	9.27273	9.11192	8.55159	8.46587	8.55173	-1.60929	-0.68642	1.60929	down	1.08674e-10	2.85044e-08
340252	ZNF680	zinc finger protein 680	3.71487	3.73735	3.88892	3.29661	3.13348	3.36348	-1.42984	-0.515857	1.42984	down	4.10361e-05	0.000524707
57634	EP400	E1A binding protein p400	6.5407	6.44178	6.5149	5.8039	6.04398	6.1076	-1.42797	-0.513967	1.42797	down	4.9262e-06	9.8135e-05
130535	KCTD18	potassium channel tetramerization domain containing 18	6.04612	6.12304	6.29999	5.6825	5.68128	5.75862	-1.36501	-0.448917	1.36501	down	1.25662e-05	0.000203542
81617	CAB39L	calcium binding protein 39 like	6.58455	6.43748	6.39674	6.90217	6.89734	7.00282	1.37667	0.461187	1.37667	up	1.17723e-06	3.22991e-05
2589	GALNT1	polypeptide N-acetylgalactosaminyltransferase 1	9.8069	9.80091	9.77746	9.28701	9.24726	9.33614	-1.41908	-0.504953	1.41908	down	4.32252e-11	1.47883e-08
22807	IKZF2	IKAROS family zinc finger 2	4.51778	4.42449	4.53327	5.04556	4.86806	5.0179	1.3999	0.485327	1.3999	up	1.4737e-05	0.000231001
4973	OLR1	oxidized low density lipoprotein (lectin-like) receptor 1	4.39051	4.42399	4.48856	5.09023	4.92697	4.71357	1.39079	0.475903	1.39079	up	0.000116059	0.00120663
79616	CCNJL	cyclin J-like	8.16659	8.07666	8.24546	8.50299	8.54875	8.58334	1.30326	0.382123	1.30326	up	2.72887e-07	1.05259e-05
54980	C2orf42	chromosome 2 open reading frame 42	6.65597	6.66512	6.58574	6.96044	7.1706	7.08418	1.35297	0.43613	1.35297	up	1.65122e-06	4.1519e-05
1183	CLCN4	chloride channel, voltage-sensitive 4	7.15668	7.25078	7.26777	7.79179	7.68688	7.75749	1.43426	0.52031	1.43426	up	1.18195e-08	9.61711e-07
144100	PLEKHA7	pleckstrin homology domain containing A7	6.13816	6.23319	6.09074	6.68937	6.71998	6.73371	1.4746	0.560323	1.4746	up	4.67337e-08	2.62295e-06
50484	RRM2B	ribonucleotide reductase M2 B (TP53 inducible)	7.2779	7.28068	7.31069	6.50775	6.46656	6.46597	-1.7528	-0.809663	1.7528	down	2.76307e-11	1.15649e-08
11320	MGAT4A	mannosyl (alpha-1,3-)-glycoprotein beta-1,4-N-acetylglucosaminyltransferase, isozyme A	4.88181	4.89739	4.90334	5.43914	5.43593	5.67497	1.53954	0.6225	1.53954	up	9.10506e-07	2.65159e-05
1438	CSF2RA	colony stimulating factor 2 receptor, alpha, low-affinity (granulocyte-macrophage)	7.11452	7.12092	7.2216	7.64582	7.75889	7.74429	1.47835	0.563987	1.47835	up	6.18671e-09	5.8937e-07
54852	PAQR5	progestin and adipoQ receptor family member V	6.04192	6.07624	5.97851	6.41326	6.47884	6.46887	1.33926	0.421433	1.33926	up	1.57136e-06	4.02202e-05
6617	SNAPC1	small nuclear RNA activating complex polypeptide 1	8.57303	8.50316	8.52319	9.02498	8.8491	8.97638	1.33517	0.417027	1.33517	up	7.50722e-08	3.86602e-06
6187	RPS2	ribosomal protein S2	11.2974	11.2497	10.7588	10.7788	10.4044	10.3891	-1.49266	-0.577883	1.49266	down	0.000197087	0.00182968
4047	LSS	lanosterol synthase (2,3-oxidosqualene-lanosterol cyclase)	8.63209	8.64687	8.68689	8.15414	8.25702	8.20002	-1.36752	-0.451557	1.36752	down	3.36495e-09	3.71884e-07
154	ADRB2	adrenoceptor beta 2	9.29409	9.25777	9.28694	10.0093	10.0216	10.0499	1.6787	0.747343	1.6787	up	4.4032e-14	1.2292e-10
9134	CCNE2	cyclin E2	6.42595	6.44732	6.46101	6.04447	5.87356	6.03414	-1.37621	-0.460703	1.37621	down	1.64496e-06	4.14412e-05
2591	GALNT3	polypeptide N-acetylgalactosaminyltransferase 3	8.1218	8.12888	8.05957	8.65319	8.54363	8.65654	1.42837	0.51437	1.42837	up	1.87435e-09	2.34855e-07
219738	C10orf35	chromosome 10 open reading frame 35	7.44521	7.47821	7.45225	6.80757	6.91118	6.93863	-1.48737	-0.572763	1.48737	down	4.60338e-09	4.75368e-07
58478	ENOPH1	enolase-phosphatase 1	7.97795	7.95631	8.04283	7.55011	7.55988	7.64616	-1.32591	-0.40698	1.32591	down	8.21161e-08	4.15267e-06
29074	MRPL18	mitochondrial ribosomal protein L18	9.79053	9.81317	9.71314	9.29567	9.2299	9.37256	-1.3879	-0.472903	1.3879	down	3.20671e-09	3.5983e-07
7852	CXCR4	chemokine (C-X-C motif) receptor 4	5.30406	5.27393	5.31248	5.69045	5.79837	5.79772	1.38066	0.465357	1.38066	up	2.80076e-06	6.26971e-05
613	BCR	breakpoint cluster region	6.20584	6.27253	6.42768	6.73442	6.75321	6.82092	1.38271	0.4675	1.38271	up	1.78703e-06	4.41832e-05
3964	LGALS8	lectin, galactoside-binding, soluble, 8	6.90339	6.81604	6.98771	6.49569	6.43563	6.55336	-1.32637	-0.407487	1.32637	down	3.22207e-06	6.98068e-05
80223	RAB11FIP1	RAB11 family interacting protein 1 (class I)	4.98187	4.79998	5.10666	5.3295	5.43915	5.62486	1.41585	0.501667	1.41585	up	7.34934e-05	0.000832333
9590	AKAP12	A-kinase anchoring protein 12	8.16336	8.1963	8.13419	7.65324	7.65922	7.74805	-1.3926	-0.47778	1.3926	down	5.33527e-09	5.34124e-07
26127	FGFR1OP2	FGFR1 oncogene partner 2	8.36218	8.35138	8.43136	7.93907	7.89024	8.01704	-1.3499	-0.432857	1.3499	down	2.86501e-08	1.80932e-06
23167	EFR3A	EFR3 homolog A	5.69884	5.64935	5.764	4.92431	5.10406	4.88295	-1.66281	-0.733623	1.66281	down	8.46929e-08	4.234e-06
1974	EIF4A2	eukaryotic translation initiation factor 4A2	4.52465	4.71599	4.98921	4.30667	4.36668	4.20223	-1.36739	-0.451423	1.36739	down	0.000596946	0.00442552
389432	SAMD5	sterile alpha motif domain containing 5	5.83517	5.85858	5.91695	5.37513	5.42774	5.39407	-1.38631	-0.471253	1.38631	down	1.48382e-06	3.85852e-05
1854	DUT	deoxyuridine triphosphatase	7.46129	7.44746	7.47594	6.60401	6.66475	6.68513	-1.75354	-0.810267	1.75354	down	2.30419e-11	1.00729e-08
112770	GLMP	glycosylated lysosomal membrane protein	8.61814	8.48804	8.53498	8.00763	7.92233	7.88004	-1.52667	-0.610387	1.52667	down	7.62126e-10	1.20908e-07
283209	PGM2L1	phosphoglucomutase 2-like 1	5.48317	5.54178	5.6208	6.30989	6.31574	6.3841	1.72667	0.787993	1.72667	up	2.29552e-09	2.72196e-07
3632	INPP5A	inositol polyphosphate-5-phosphatase A	8.00685	8.00847	8.05302	8.36483	8.41813	8.48275	1.31871	0.399123	1.31871	up	3.44244e-08	2.07094e-06
206358	SLC36A1	solute carrier family 36 (proton/amino acid symporter), member 1	6.85807	7.07326	6.96132	6.60976	6.51675	6.61309	-1.30527	-0.38435	1.30527	down	1.01517e-05	0.000172457
56181	MTFR1L	mitochondrial fission regulator 1-like	7.48937	7.43513	7.46297	7.09646	7.0203	7.09608	-1.3118	-0.391543	1.3118	down	2.07186e-07	8.41232e-06
126321	MFSD12	major facilitator superfamily domain containing 12	7.61643	7.72116	7.7224	8.03638	8.19652	8.05506	1.32806	0.409323	1.32806	up	4.75527e-07	1.60233e-05
10733	PLK4	polo-like kinase 4	5.65719	5.43462	5.35496	4.98833	5.08559	5.21523	-1.30665	-0.385873	1.30665	down	0.000486432	0.0037607
26100	WIPI2	WD repeat domain, phosphoinositide interacting 2	6.06427	6.12875	6.02646	5.56924	5.60509	5.56301	-1.40839	-0.494047	1.40839	down	6.10438e-07	1.95102e-05
79901	CYBRD1	cytochrome b reductase 1	7.06231	7.08959	7.09418	5.97414	5.98348	5.95236	-2.1615	-1.11203	2.1615	down	1.07129e-12	1.10806e-09
4681	NBL1	neuroblastoma 1, DAN family BMP antagonist	7.43081	7.43503	7.53903	6.95085	6.98292	6.9467	-1.42221	-0.508133	1.42221	down	1.46084e-08	1.1041e-06
22890	ZBTB1	zinc finger and BTB domain containing 1	5.56603	5.7156	5.54001	6.00356	5.86398	6.14212	1.31586	0.396007	1.31586	up	0.000127796	0.00130226
26512	INTS6	integrator complex subunit 6	7.04088	7.06903	7.12346	7.46813	7.5042	7.60145	1.36302	0.446803	1.36302	up	1.21704e-07	5.63332e-06
8676	STX11	syntaxin 11	3.71639	3.90837	3.89513	4.29354	4.36985	4.33893	1.40848	0.494143	1.40848	up	2.24139e-05	0.000322786
3652	IPP	intracisternal A particle-promoted polypeptide	5.42752	5.54109	5.55266	4.63692	4.80256	4.92424	-1.64625	-0.719183	1.64625	down	3.26928e-07	1.21003e-05
51704	GPRC5B	G protein-coupled receptor, class C, group 5, member B	5.78627	5.7015	5.94289	6.20278	6.21977	6.30347	1.3489	0.431787	1.3489	up	1.47793e-05	0.000231342
23177	CEP68	centrosomal protein 68kDa	4.3368	4.66978	4.59777	4.90716	4.84436	5.07474	1.3262	0.407303	1.3262	up	0.000640923	0.00467751
6210	RPS15A	ribosomal protein S15a	5.00084	5.22938	5.34888	5.71377	5.80856	5.68925	1.45817	0.54416	1.45817	up	1.23805e-05	0.000201197
81537	SGPP1	sphingosine-1-phosphate phosphatase 1	6.88206	6.87272	6.92111	6.39282	6.4814	6.38987	-1.38569	-0.4706	1.38569	down	1.32862e-07	6.03617e-06
51422	PRKAG2	protein kinase, AMP-activated, gamma 2 non-catalytic subunit	8.88892	8.88692	8.8619	8.43005	8.47479	8.43902	-1.34844	-0.431293	1.34844	down	7.45984e-10	1.19309e-07
8573	CASK	calcium/calmodulin-dependent serine protein kinase (MAGUK family)	7.98028	8.01655	7.94011	8.36595	8.36938	8.39538	1.31761	0.397923	1.31761	up	1.20911e-08	9.78831e-07
83607	AMMECR1L	AMMECR1 like	7.3058	7.28668	7.30837	6.6275	6.66404	6.78498	-1.52426	-0.60811	1.52426	down	5.4133e-09	5.3903e-07
55536	CDCA7L	cell division cycle associated 7-like	8.42483	8.40618	8.45794	7.70065	7.76488	7.78213	-1.60262	-0.68043	1.60262	down	1.85912e-11	8.60532e-09
653	BMP5	bone morphogenetic protein 5	3.947	4.05994	4.26841	4.6673	4.51098	4.41583	1.35622	0.439587	1.35622	up	0.000373033	0.00305
28996	HIPK2	homeodomain interacting protein kinase 2	8.74297	8.75333	8.67202	8.15002	8.18461	8.29854	-1.42575	-0.511717	1.42575	down	4.48513e-09	4.68067e-07
6307	MSMO1	methylsterol monooxygenase 1	10.0617	10.015	9.98261	9.47152	9.4358	9.52608	-1.45597	-0.54198	1.45597	down	3.56158e-11	1.34737e-08
9953	HS3ST3B1	heparan sulfate-glucosamine 3-sulfotransferase 3B1	6.76959	6.68321	6.78967	7.41329	7.46245	7.40695	1.60222	0.680073	1.60222	up	4.46872e-10	8.29326e-08
57561	ARRDC3	arrestin domain containing 3	5.16488	5.18427	5.08385	5.8445	5.79944	5.9465	1.64621	0.719147	1.64621	up	2.76697e-08	1.76155e-06
8738	CRADD	CASP2 and RIPK1 domain containing adaptor with death domain	6.34128	6.38718	6.33248	5.75998	6.03759	5.90805	-1.36772	-0.451773	1.36772	down	1.00237e-05	0.000170649
7170	TPM3	tropomyosin 3	5.64004	5.71422	5.68982	5.19006	5.25623	5.38815	-1.32245	-0.403213	1.32245	down	3.56322e-05	0.000469181
1525	CXADR	coxsackie virus and adenovirus receptor	3.88677	3.99715	4.07787	4.27657	4.41777	4.41913	1.30486	0.383893	1.30486	up	0.00030686	0.00260814
9194	SLC16A7	solute carrier family 16 (monocarboxylate transporter), member 7	3.68488	3.92108	3.8744	4.3368	4.3306	4.39159	1.44014	0.52621	1.44014	up	1.53968e-05	0.000238212
200728	TMEM17	transmembrane protein 17	4.98638	5.02488	5.18455	4.62754	4.56084	4.54252	-1.40279	-0.488303	1.40279	down	1.30863e-05	0.000210925
29957	SLC25A24	solute carrier family 25 (mitochondrial carrier; phosphate carrier), member 24	7.93107	8.0707	7.90302	7.19783	7.16245	7.12092	-1.75062	-0.807863	1.75062	down	7.7723e-11	2.19995e-08
79633	FAT4	FAT atypical cadherin 4	6.35601	6.3579	6.35362	6.90201	6.90201	6.95639	1.47866	0.564293	1.47866	up	7.50865e-09	6.79127e-07
374	AREG	amphiregulin	7.02435	7.1006	7.11418	7.47771	7.42745	7.50255	1.30996	0.389527	1.30996	up	3.12498e-07	1.16916e-05
147372	CCBE1	collagen and calcium binding EGF domains 1	5.91826	5.91919	5.85225	6.38852	6.46285	6.45564	1.45307	0.539103	1.45307	up	8.81724e-08	4.38012e-06
148534	TMEM56	transmembrane protein 56	5.01364	4.88449	4.73054	5.37963	5.27717	5.47153	1.4141	0.499887	1.4141	up	2.84176e-05	0.000393268
440224	CXADRP3	coxsackie virus and adenovirus receptor pseudogene 3	3.88677	3.99715	4.07787	4.27657	4.41777	4.41913	1.30486	0.383893	1.30486	up	0.00030686	0.00260814
81579	PLA2G12A	phospholipase A2 group XIIA	7.12388	7.16475	7.37163	7.55769	7.65607	7.64941	1.3204	0.40097	1.3204	up	6.90868e-06	0.000127687
727936	GXYLT2	glucoside xylosyltransferase 2	6.87655	6.82686	7.02996	7.26991	7.48549	7.38012	1.3826	0.467383	1.3826	up	2.33737e-06	5.42546e-05
9022	CLIC3	chloride intracellular channel 3	8.3407	8.38437	8.44586	8.91549	8.93334	8.97374	1.46464	0.550547	1.46464	up	1.74653e-10	4.04209e-08
3077	HFE	hemochromatosis	5.41101	5.33932	5.43821	4.86806	4.96007	5.17198	-1.31599	-0.396143	1.31599	down	0.000216509	0.00197595
28512	NKIRAS1	NFKB inhibitor interacting Ras-like 1	6.51133	6.64363	6.45326	5.65839	5.64111	5.67753	-1.83663	-0.877063	1.83663	down	6.99983e-10	1.14274e-07
728715	LOC728715	ovostatin homolog 2	6.13823	6.19743	6.36058	5.57059	5.44598	5.72858	-1.56956	-0.650363	1.56956	down	8.24711e-07	2.46374e-05
102659353	THRIL	TNF and HNRNPL related immunoregulatory long non-coding RNA	6.13503	6.08089	6.13412	5.4423	5.59342	5.68089	-1.45849	-0.544477	1.45849	down	1.10604e-06	3.08843e-05
54521	WDR44	WD repeat domain 44	6.29712	6.28102	6.40848	5.73451	5.69184	6.08427	-1.40639	-0.492	1.40639	down	5.79568e-05	0.000687871
6917	TCEA1	transcription elongation factor A (SII), 1	7.62655	7.7173	7.60479	7.05915	7.23713	7.27367	-1.37513	-0.459563	1.37513	down	7.34325e-07	2.26038e-05
84881	RPUSD4	RNA pseudouridylate synthase domain containing 4	7.83956	7.9915	7.89698	8.42017	8.43533	8.45075	1.44	0.52607	1.44	up	2.42529e-09	2.84565e-07
7576	ZNF28	zinc finger protein 28	5.33484	5.36793	5.33134	4.57452	4.97095	4.8341	-1.46562	-0.551513	1.46562	down	2.31292e-05	0.000330306
255231	MCOLN2	mucolipin 2	6.64377	6.66443	6.72598	6.19288	6.27414	6.18048	-1.37767	-0.462227	1.37767	down	3.64197e-07	1.31458e-05
4300	MLLT3	myeloid/lymphoid or mixed-lineage leukemia; translocated to, 3	4.63627	4.61991	4.52505	5.11049	4.75344	5.12125	1.32071	0.401317	1.32071	up	0.000789079	0.00550821
8728	ADAM19	ADAM metallopeptidase domain 19	7.02924	6.95377	7.05106	7.33655	7.49548	7.47024	1.34046	0.422733	1.34046	up	6.53569e-07	2.0605e-05
10055	SAE1	SUMO1 activating enzyme subunit 1	10.0436	10.0561	10.0501	9.66466	9.60811	9.68625	-1.3167	-0.39693	1.3167	down	3.91098e-10	7.4696e-08
58528	RRAGD	Ras-related GTP binding D	6.58816	6.58816	6.58533	6.10731	6.11006	6.13991	-1.38331	-0.468123	1.38331	down	1.59332e-07	6.95756e-06
64841	GNPNAT1	glucosamine-phosphate N-acetyltransferase 1	8.98774	8.92484	8.9638	8.4503	8.49643	8.47901	-1.39818	-0.483547	1.39818	down	2.44276e-10	5.1671e-08
57619	SHROOM3	shroom family member 3	7.44141	7.44262	7.55362	7.76789	7.91898	7.91445	1.30848	0.38789	1.30848	up	1.27469e-06	3.43268e-05
81606	LBH	limb bud and heart development	5.54918	5.33919	5.58067	5.94459	6.10102	5.98249	1.43364	0.519687	1.43364	up	5.49845e-06	0.000106672
27346	TMEM97	transmembrane protein 97	9.1934	9.2171	9.08405	8.7189	8.62934	8.67791	-1.40393	-0.489467	1.40393	down	2.90841e-09	3.32641e-07
412	STS	steroid sulfatase (microsomal), isozyme S	6.7028	6.58134	6.67372	7.00674	7.11809	6.9879	1.30582	0.384957	1.30582	up	3.26634e-06	7.04942e-05
8061	FOSL1	FOS-like antigen 1	7.8799	7.91872	8.063	8.32777	8.42359	8.31964	1.32237	0.403127	1.32237	up	5.69108e-07	1.84288e-05
8798	DYRK4	dual specificity tyrosine-(Y)-phosphorylation regulated kinase 4	6.78442	6.73795	6.91785	6.36191	6.42367	6.43934	-1.32418	-0.4051	1.32418	down	3.7703e-06	7.91985e-05
11231	SEC63	SEC63 homolog, protein translocation regulator	8.66008	8.6552	8.50598	8.12104	7.98286	8.0974	-1.45396	-0.539987	1.45396	down	1.39596e-08	1.07271e-06
5873	RAB27A	RAB27A, member RAS oncogene family	6.8809	6.91118	6.88405	6.46083	6.44886	6.4829	-1.34522	-0.427847	1.34522	down	1.93292e-07	8.04939e-06
57380	MRS2	MRS2, magnesium transporter	7.52838	7.57802	7.57631	8.02654	8.04181	7.94642	1.36039	0.44402	1.36039	up	1.62094e-08	1.18779e-06
100101490	MCTS2P	malignant T-cell amplified sequence 2, pseudogene	7.19335	7.19426	7.04268	6.60128	6.42451	6.67449	-1.4914	-0.57667	1.4914	down	3.41918e-07	1.2519e-05
3422	IDI1	isopentenyl-diphosphate delta isomerase 1	9.77259	9.82581	9.71862	9.39349	9.32696	9.4098	-1.31548	-0.39559	1.31548	down	6.264e-09	5.93857e-07
5465	PPARA	peroxisome proliferator-activated receptor alpha	6.20142	6.38644	6.35405	6.81807	6.86663	6.85084	1.44514	0.53121	1.44514	up	1.62212e-07	7.021e-06
321	APBA2	amyloid beta (A4) precursor protein-binding, family A, member 2	4.7756	4.67399	4.67399	5.269	5.05325	5.12657	1.35825	0.441747	1.35825	up	4.1271e-05	0.000527026
10159	ATP6AP2	ATPase, H+ transporting, lysosomal accessory protein 2	7.853	7.88091	7.91722	7.28259	7.21848	7.25749	-1.54848	-0.630857	1.54848	down	1.58687e-10	3.83029e-08
9653	HS2ST1	heparan sulfate 2-O-sulfotransferase 1	5.75079	5.61752	5.5389	4.67702	4.92542	5.07717	-1.67311	-0.742533	1.67311	down	1.46989e-06	3.82497e-05
64853	AIDA	axin interactor, dorsalization associated	7.68485	7.73197	7.82556	7.30704	7.39179	7.38139	-1.30802	-0.387387	1.30802	down	5.17846e-07	1.71068e-05
4155	MBP	myelin basic protein	4.2981	4.33918	4.51933	4.87814	4.85569	4.78819	1.37091	0.455137	1.37091	up	4.35134e-05	0.000548891
63917	GALNT11	polypeptide N-acetylgalactosaminyltransferase 11	7.37127	7.26079	7.35189	6.76256	6.88369	6.82897	-1.41707	-0.50291	1.41707	down	5.3944e-08	2.96836e-06
6484	ST3GAL4	ST3 beta-galactoside alpha-2,3-sialyltransferase 4	7.47437	7.55187	7.64253	6.88682	7.00543	7.05735	-1.48767	-0.573057	1.48767	down	4.10849e-08	2.37015e-06
1997	ELF1	E74-like factor 1 (ets domain transcription factor)	5.89435	6.13062	6.12469	5.51608	5.70469	5.74667	-1.3141	-0.394073	1.3141	down	0.000184155	0.00173293
5073	PARN	poly(A)-specific ribonuclease	4.79838	5.14007	5.14387	4.59332	4.71978	4.6248	-1.30267	-0.381473	1.30267	down	0.000988253	0.00660919
133619	PRRC1	proline-rich coiled-coil 1	9.14172	9.06644	8.96791	8.64734	8.58811	8.65641	-1.34543	-0.42807	1.34543	down	3.90825e-08	2.28374e-06
3399	ID3	inhibitor of DNA binding 3, dominant negative helix-loop-helix protein	7.0824	7.02177	6.95815	7.83928	7.88524	7.89255	1.80448	0.851583	1.80448	up	1.03848e-11	5.44774e-09
81671	VMP1	vacuole membrane protein 1	8.07476	8.02119	8.0493	8.65712	8.6377	8.59013	1.49475	0.5799	1.49475	up	6.37104e-11	1.87061e-08
9831	ZNF623	zinc finger protein 623	5.64975	5.94645	5.90132	6.18701	6.3179	6.20992	1.3248	0.40577	1.3248	up	9.26183e-05	0.00100496
54557	SGTB	small glutamine-rich tetratricopeptide repeat (TPR)-containing, beta	4.07511	4.20628	4.37283	3.74834	3.73613	3.80744	-1.36993	-0.454103	1.36993	down	0.000118021	0.00122196
10730	YME1L1	YME1 like 1 ATPase	4.65951	4.36173	4.71882	3.92524	3.86574	3.82405	-1.63393	-0.708343	1.63393	down	2.4284e-06	5.59984e-05
102723478	LOC102723478	coxsackievirus and adenovirus receptor pseudogene	3.88677	3.99715	4.07787	4.27657	4.41777	4.41913	1.30486	0.383893	1.30486	up	0.00030686	0.00260814
387914	SHISA2	shisa family member 2	7.51514	7.55163	7.49553	7.99951	7.91702	7.93276	1.3463	0.428997	1.3463	up	2.12016e-08	1.45323e-06
9276	COPB2	coatomer protein complex subunit beta 2 (beta prime)	7.21323	7.09241	7.29484	6.78802	6.84145	6.79922	-1.31094	-0.390597	1.31094	down	3.1678e-06	6.90492e-05
144165	PRICKLE1	prickle homolog 1	6.34782	6.37559	6.40425	6.72522	6.74986	6.80789	1.30595	0.385103	1.30595	up	1.54887e-06	3.98553e-05
57016	AKR1B10	aldo-keto reductase family 1, member B10 (aldose reductase)	4.66297	4.60772	4.68507	3.84759	4.15298	3.97336	-1.58075	-0.66061	1.58075	down	1.93555e-06	4.70075e-05
23023	TMCC1	transmembrane and coiled-coil domain family 1	5.96534	6.04223	6.05272	6.50608	6.50686	6.52657	1.40744	0.493073	1.40744	up	1.73358e-07	7.34185e-06
4780	NFE2L2	nuclear factor, erythroid 2 like 2	9.95271	9.96542	9.95446	9.38304	9.3807	9.43206	-1.47318	-0.55893	1.47318	down	2.4935e-12	2.08666e-09
6775	STAT4	signal transducer and activator of transcription 4	5.08365	4.88455	5.19577	5.44078	5.36915	5.6242	1.34107	0.423387	1.34107	up	0.000282236	0.00243676
2280	FKBP1A	FK506 binding protein 1A	7.2631	7.32477	7.35902	7.70057	7.75278	7.8191	1.35835	0.441853	1.35835	up	7.08991e-08	3.68002e-06
7037	TFRC	transferrin receptor	8.47515	8.50834	8.50279	7.91445	7.99766	7.94237	-1.45794	-0.543933	1.45794	down	2.21245e-10	4.78278e-08
6495	SIX1	SIX homeobox 1	5.23598	5.0819	5.30171	5.70225	5.69393	5.88673	1.4686	0.55444	1.4686	up	4.09164e-06	8.4638e-05
6574	SLC20A1	solute carrier family 20 (phosphate transporter), member 1	11.4424	11.4381	11.4583	10.9396	10.9184	10.9258	-1.4323	-0.518333	1.4323	down	1.44137e-13	2.5266e-10
23554	TSPAN12	tetraspanin 12	6.15998	6.16608	6.08089	6.54554	6.50707	6.52151	1.30954	0.389057	1.30954	up	2.5669e-06	5.85123e-05
29116	MYLIP	myosin regulatory light chain interacting protein	6.2289	6.34349	6.2857	6.80828	6.78888	6.94261	1.47484	0.56056	1.47484	up	8.44238e-08	4.22592e-06
56253	CRTAM	cytotoxic and regulatory T-cell molecule	4.00196	3.74461	3.92885	4.50981	4.16254	4.65874	1.466	0.55189	1.466	up	0.000245539	0.00218334
118460	EXOSC6	exosome component 6	9.19338	9.19932	9.15309	8.47443	8.43697	8.39301	-1.67845	-0.747127	1.67845	down	8.988e-13	1.02747e-09
9553	MRPL33	mitochondrial ribosomal protein L33	9.25622	9.23822	9.18121	9.64867	9.6336	9.63068	1.33093	0.412433	1.33093	up	4.89011e-10	8.82553e-08
55731	FAM222B	family with sequence similarity 222 member B	5.40438	5.66812	5.59287	6.1412	6.09492	6.09492	1.4694	0.555223	1.4694	up	1.38414e-06	3.64546e-05
1824	DSC2	desmocollin 2	3.72088	3.81423	3.78993	2.99964	3.3539	3.34396	-1.45651	-0.542513	1.45651	down	7.5101e-05	0.00084664
3052	HCCS	holocytochrome c synthase	6.82138	6.92858	6.98045	7.50787	7.4302	7.47774	1.47611	0.5618	1.47611	up	1.32146e-08	1.03642e-06
4685	NCAM2	neural cell adhesion molecule 2	3.31122	3.63406	3.57466	3.86136	4.13147	3.89958	1.37315	0.45749	1.37315	up	0.000473649	0.00367849
6581	SLC22A3	solute carrier family 22 (organic cation transporter), member 3	4.53987	4.66992	4.49742	5.20391	4.86806	5.17378	1.42686	0.512847	1.42686	up	6.4646e-05	0.000751383
51107	APH1A	aph-1 homolog A, gamma secretase subunit	8.89828	8.89692	8.65151	8.13645	8.00778	8.11887	-1.65619	-0.72787	1.65619	down	4.06845e-09	4.34971e-07
3069	HDLBP	high density lipoprotein binding protein	7.8449	7.85074	7.92771	8.23404	8.33143	8.3578	1.35032	0.433307	1.35032	up	3.75265e-08	2.21688e-06
134957	STXBP5	syntaxin binding protein 5 (tomosyn)	6.41291	6.46836	6.53827	6.03136	6.07019	6.09923	-1.32524	-0.406253	1.32524	down	2.92262e-06	6.47496e-05
58487	CREBZF	CREB/ATF bZIP transcription factor	5.9469	6.06661	5.92736	5.34035	5.35776	5.38407	-1.53641	-0.619563	1.53641	down	8.95069e-08	4.4291e-06
54556	ING3	inhibitor of growth family member 3	6.68053	6.74677	6.77009	6.24352	6.21491	6.32846	-1.38527	-0.470167	1.38527	down	3.39186e-07	1.24603e-05
284207	METRNL	meteorin, glial cell differentiation regulator-like	5.83812	5.85959	6.07863	6.23308	6.31445	6.3931	1.30867	0.388097	1.30867	up	7.43705e-05	0.000840572
55634	KRBOX4	KRAB box domain containing 4	4.80503	4.85292	4.91285	5.18701	5.25215	5.37122	1.33163	0.413193	1.33163	up	4.95818e-05	0.000608658
169200	TMEM64	transmembrane protein 64	8.28769	8.31223	8.20444	7.65256	7.60991	7.6699	-1.54114	-0.623997	1.54114	down	1.71779e-10	4.02291e-08
5701	PSMC2	proteasome 26S subunit, ATPase 2	5.36912	5.20916	5.2011	4.29778	4.57733	4.72054	-1.65624	-0.72791	1.65624	down	2.95461e-06	6.52267e-05
327	APEH	acylaminoacyl-peptide hydrolase	8.59572	8.65045	8.66767	7.22767	7.37939	7.30144	-2.52295	-1.33511	2.52295	down	1.69305e-14	6.66112e-11
64065	PERP	PERP, TP53 apoptosis effector	4.41862	4.43045	4.67115	4.07896	4.00155	4.02895	-1.38535	-0.470253	1.38535	down	6.24688e-05	0.00073148
80010	RMI1	RecQ mediated genome instability 1	6.54376	6.37835	6.25784	6.00392	5.96943	5.96923	-1.33095	-0.412457	1.33095	down	2.66897e-05	0.000372368
348094	ANKDD1A	ankyrin repeat and death domain containing 1A	3.32033	3.64845	3.67531	3.90979	4.04338	4.03112	1.36295	0.446733	1.36295	up	0.000441083	0.00347914
256356	GK5	glycerol kinase 5 (putative)	6.12129	6.27744	6.20315	5.68955	5.80235	5.76824	-1.36344	-0.447247	1.36344	down	3.7097e-06	7.81759e-05
6717	SRI	sorcin	8.85501	8.87683	8.84522	8.46846	8.49331	8.47326	-1.30195	-0.380677	1.30195	down	2.95234e-09	3.34745e-07
57587	CFAP97	cilia and flagella associated protein 97	3.98776	4.06914	4.07135	3.24535	3.7306	3.547	-1.44904	-0.5351	1.44904	down	0.000179191	0.00169433
11221	DUSP10	dual specificity phosphatase 10	8.30314	8.34511	8.3322	8.75552	8.83212	8.77874	1.37743	0.461977	1.37743	up	8.52556e-10	1.31753e-07
5601	MAPK9	mitogen-activated protein kinase 9	3.73992	3.9628	3.93531	4.31846	4.15794	4.31795	1.30626	0.38544	1.30626	up	0.000492925	0.00379523
57494	RIMKLB	ribosomal modification protein rimK-like family member B	4.74288	4.54651	4.82379	4.23928	4.24816	4.35321	-1.34181	-0.424177	1.34181	down	0.000171643	0.00163758
6251	RSU1	Ras suppressor protein 1	8.61421	8.59832	8.63002	8.03905	8.06617	8.05604	-1.47471	-0.56043	1.47471	down	4.12258e-11	1.46125e-08
79884	MAP9	microtubule associated protein 9	6.34435	6.35884	6.32964	5.93074	5.75553	6.01866	-1.35908	-0.442633	1.35908	down	1.00088e-05	0.000170471
9314	KLF4	Kruppel-like factor 4 (gut)	7.51458	7.62619	7.31461	7.90709	7.78963	7.91503	1.30627	0.385457	1.30627	up	2.96567e-05	0.000405103
201931	TMEM192	transmembrane protein 192	4.26733	4.21259	4.18217	4.67217	4.58758	4.67857	1.34295	0.42541	1.34295	up	3.79749e-05	0.000493098
123879	DCUN1D3	DCN1, defective in cullin neddylation 1, domain containing 3	5.17924	5.24286	5.26844	5.57731	5.74687	5.76664	1.382	0.46676	1.382	up	8.90958e-06	0.000155518
1717	DHCR7	7-dehydrocholesterol reductase	10.1464	10.185	10.2511	9.77271	9.82065	9.83418	-1.30589	-0.38503	1.30589	down	2.77103e-09	3.19717e-07
114971	PTPMT1	protein tyrosine phosphatase, mitochondrial 1	6.50382	6.49275	6.41367	5.70678	5.84119	5.75897	-1.62574	-0.7011	1.62574	down	7.48043e-09	6.78134e-07
79149	ZSCAN5A	zinc finger and SCAN domain containing 5A	3.87919	3.36464	3.93082	4.1684	3.98058	4.16681	1.30168	0.38038	1.30168	up	0.0087901	0.037534
3096	HIVEP1	human immunodeficiency virus type I enhancer binding protein 1	4.96717	5.06084	4.97682	5.4121	5.52469	5.50221	1.39287	0.478057	1.39287	up	4.53935e-06	9.19177e-05
5281	PIGF	phosphatidylinositol glycan anchor biosynthesis class F	5.8341	5.87915	5.92499	5.46746	5.49033	5.51243	-1.30979	-0.38934	1.30979	down	1.15525e-05	0.000190415
1979	EIF4EBP2	eukaryotic translation initiation factor 4E binding protein 2	8.17901	8.20051	8.25375	8.61472	8.68362	8.73207	1.381	0.465713	1.381	up	4.50066e-09	4.68067e-07
50862	RNF141	ring finger protein 141	5.30117	5.31579	5.62405	4.94505	4.92504	4.97144	-1.38175	-0.466493	1.38175	down	7.31355e-05	0.000828995
2773	GNAI3	guanine nucleotide binding protein (G protein), alpha inhibiting activity polypeptide 3	6.86038	6.83868	7.00963	6.11438	6.11438	6.238	-1.67866	-0.74731	1.67866	down	4.42076e-09	4.64603e-07
4968	OGG1	8-oxoguanine DNA glycosylase	6.78639	6.74792	6.79408	7.11663	7.22055	7.12888	1.30064	0.379223	1.30064	up	9.18468e-07	2.67082e-05
11107	PRDM5	PR domain containing 5	4.59125	4.67587	4.54539	3.94683	4.21913	4.19116	-1.39971	-0.48513	1.39971	down	5.97484e-05	0.000705292
92106	OXNAD1	oxidoreductase NAD-binding domain containing 1	5.66044	5.55212	5.78297	5.00873	4.97861	5.05494	-1.57035	-0.651083	1.57035	down	2.82978e-07	1.07987e-05
10928	RALBP1	ralA binding protein 1	8.05734	8.0746	8.17138	7.60488	7.69399	7.60488	-1.38178	-0.466523	1.38178	down	2.22642e-08	1.50768e-06
6782	HSPA13	heat shock protein family A (Hsp70) member 13	7.28206	7.44117	7.31455	6.89084	6.64283	6.75448	-1.49818	-0.58321	1.49818	down	1.79353e-07	7.56318e-06
730092	RRN3P1	RRN3 homolog, RNA polymerase I transcription factor pseudogene 1	4.4203	4.68007	4.89694	4.22965	4.11018	4.31746	-1.36289	-0.446673	1.36289	down	0.000846636	0.00584662
26996	GPR160	G protein-coupled receptor 160	5.97303	6.0722	6.05368	5.45708	5.60135	5.66548	-1.37395	-0.458333	1.37395	down	7.17249e-06	0.00013101
2116	ETV2	ets variant 2	4.49742	4.39385	4.4078	4.65019	5.03398	4.84966	1.33015	0.411587	1.33015	up	0.000491462	0.00378694
26468	LHX6	LIM homeobox 6	5.07953	5.34122	5.28242	5.6825	5.6972	5.66411	1.36309	0.44688	1.36309	up	2.66398e-05	0.000372068
79646	PANK3	pantothenate kinase 3	6.73954	6.75254	6.65097	7.17407	7.00437	7.1483	1.31454	0.394563	1.31454	up	3.495e-06	7.45702e-05
9690	UBE3C	ubiquitin protein ligase E3C	5.61878	5.57924	5.61092	5.2156	5.13514	5.32244	-1.30007	-0.378587	1.30007	down	5.83768e-05	0.000692057
2012	EMP1	epithelial membrane protein 1	6.21635	6.23684	6.26242	5.6241	5.73882	5.91806	-1.39301	-0.47821	1.39301	down	8.38042e-06	0.000147984
25978	CHMP2B	charged multivesicular body protein 2B	8.10825	8.04713	7.97717	7.31658	7.3074	7.26787	-1.67818	-0.7469	1.67818	down	4.01317e-11	1.46125e-08
653390	RRN3P2	RRN3 homolog, RNA polymerase I transcription factor pseudogene 2	4.4203	4.68007	4.89694	4.22965	4.11018	4.31746	-1.36289	-0.446673	1.36289	down	0.000846636	0.00584662
51062	ATL1	atlastin GTPase 1	3.0619	3.20922	3.38674	3.47974	3.76132	3.97694	1.434	0.520047	1.434	up	0.000608693	0.00449482
6392	SDHD	succinate dehydrogenase complex subunit D, integral membrane protein	9.15626	9.15178	9.22366	8.67584	8.73326	8.70028	-1.38906	-0.474107	1.38906	down	3.6356e-10	7.01172e-08
3340	NDST1	N-deacetylase/N-sulfotransferase (heparan glucosaminyl) 1	8.2613	8.24011	8.34633	7.87123	7.88875	7.90549	-1.31411	-0.39409	1.31411	down	3.86987e-08	2.27248e-06
652968	GATSL3	GATS protein-like 3	5.62741	5.62722	5.74274	6.01121	6.13642	6.05844	1.32216	0.4029	1.32216	up	1.26613e-05	0.000204914
3075	CFH	complement factor H	5.19917	5.27933	5.24723	5.59149	5.72404	5.64559	1.33034	0.411797	1.33034	up	1.60328e-05	0.000245924
157922	CAMSAP1	calmodulin regulated spectrin associated protein 1	8.06421	8.04535	8.11716	7.56118	7.65292	7.66858	-1.36416	-0.448013	1.36416	down	2.09919e-08	1.4515e-06
23473	CAPN7	calpain 7	7.57675	7.69781	7.64854	7.08949	7.05022	7.1564	-1.45632	-0.54233	1.45632	down	9.27043e-09	7.99859e-07
6482	ST3GAL1	ST3 beta-galactoside alpha-2,3-sialyltransferase 1	6.58561	6.46381	6.66776	6.90214	7.02005	7.01501	1.32563	0.406673	1.32563	up	5.77036e-06	0.000110606
51478	HSD17B7	hydroxysteroid (17-beta) dehydrogenase 7	5.67488	5.80242	5.47094	5.10432	5.1791	5.06422	-1.44747	-0.533533	1.44747	down	1.24763e-05	0.000202291
7048	TGFBR2	transforming growth factor beta receptor II	10.2158	10.1814	10.1993	10.6272	10.5451	10.6064	1.3141	0.39407	1.3141	up	2.76942e-10	5.76508e-08
84159	ARID5B	AT-rich interaction domain 5B	7.46462	7.36977	7.52375	8.03546	8.00403	8.06475	1.49696	0.582033	1.49696	up	1.93311e-09	2.39925e-07
5101	PCDH9	protocadherin 9	5.55936	5.39424	5.72404	6.111	6.18075	6.11703	1.49179	0.577047	1.49179	up	2.33138e-06	5.41474e-05
8905	AP1S2	adaptor-related protein complex 1 sigma 2 subunit	5.77298	5.83522	6.00339	5.16597	5.37176	5.51842	-1.43245	-0.51848	1.43245	down	3.62768e-05	0.000475125
54700	RRN3	RRN3 homolog, RNA polymerase I transcription factor	4.4203	4.68007	4.89694	4.22965	4.11018	4.31746	-1.36289	-0.446673	1.36289	down	0.000846636	0.00584662
51026	GOLT1B	golgi transport 1B	6.0892	6.22329	6.12957	5.65777	5.61555	5.82539	-1.36394	-0.447783	1.36394	down	1.06363e-05	0.000178683
2825	GPR1	G protein-coupled receptor 1	6.79713	6.74391	6.99278	7.33667	7.36463	7.3375	1.41584	0.50166	1.41584	up	4.6195e-07	1.57495e-05
55857	KIZ	kizuna centrosomal protein	4.83685	4.6943	4.63701	4.37216	4.19784	4.38127	-1.32467	-0.40563	1.32467	down	0.000209463	0.00192459
740	MRPL49	mitochondrial ribosomal protein L49	9.66762	9.65828	9.7488	9.24735	9.29839	9.25988	-1.34074	-0.423027	1.34074	down	1.05306e-09	1.52677e-07
55714	TENM3	teneurin transmembrane protein 3	7.16798	7.19624	7.39137	7.6275	7.70382	7.71666	1.34798	0.430797	1.34798	up	1.58592e-06	4.04647e-05
27309	ZNF330	zinc finger protein 330	8.60765	8.63429	8.65906	8.22011	8.26128	8.25714	-1.30812	-0.38749	1.30812	down	6.70518e-09	6.26624e-07
26273	FBXO3	F-box protein 3	4.65733	5.02277	4.73095	4.55278	4.22185	4.4089	-1.32792	-0.409173	1.32792	down	0.00145539	0.00901157
84984	CEP19	centrosomal protein 19kDa	5.29143	5.32072	5.53106	4.80073	4.73124	4.88217	-1.49108	-0.576357	1.49108	down	3.65917e-06	7.7318e-05
285189	PLGLA	plasminogen-like A (pseudogene)	4.05571	4.13341	3.99902	4.45696	4.58787	4.28594	1.30213	0.380877	1.30213	up	0.000621597	0.00456868
1755	DMBT1	deleted in malignant brain tumors 1	7.41845	7.36271	7.34546	6.9699	6.92856	6.99256	-1.33041	-0.411867	1.33041	down	1.36464e-07	6.17021e-06
7376	NR1H2	nuclear receptor subfamily 1 group H member 2	6.79332	6.90652	6.79022	7.24531	7.34457	7.24848	1.3655	0.449433	1.3655	up	2.51827e-07	9.87823e-06
664701	ZNF826P	zinc finger protein 826, pseudogene	5.13237	5.27208	5.21044	4.62958	4.74787	5.01041	-1.32777	-0.40901	1.32777	down	0.000480959	0.00372671
9462	RASAL2	RAS protein activator like 2	7.41243	7.4527	7.55093	7.92945	8.0026	7.94339	1.401	0.48646	1.401	up	1.84051e-08	1.3166e-06
8701	DNAH11	dynein, axonemal, heavy chain 11	8.04951	7.98028	8.00306	7.47984	7.49574	7.49154	-1.43585	-0.52191	1.43585	down	8.53933e-10	1.31753e-07
1645	AKR1C1	aldo-keto reductase family 1, member C1	4.25299	4.6943	4.85986	4.02772	3.82405	4.1699	-1.51064	-0.59516	1.51064	down	0.000448346	0.0035202
55344	PLCXD1	phosphatidylinositol-specific phospholipase C, X domain containing 1	6.28924	6.41127	6.41933	6.73313	6.82624	6.79473	1.32999	0.41142	1.32999	up	2.00205e-06	4.80882e-05
84223	IQCG	IQ motif containing G	4.49532	4.63811	4.47343	5.03983	4.95991	4.99241	1.37722	0.461763	1.37722	up	1.84009e-05	0.000274438
10097	ACTR2	ARP2 actin-related protein 2 homolog (yeast)	8.66269	8.60387	8.47245	8.19118	8.12296	8.2669	-1.30676	-0.38599	1.30676	down	1.23268e-06	3.34474e-05
2395	FXN	frataxin	8.10019	8.05504	8.09248	7.73616	7.59972	7.76277	-1.30407	-0.38302	1.30407	down	4.41961e-07	1.52665e-05
10447	FAM3C	family with sequence similarity 3 member C	9.57084	9.61514	9.43586	10.1817	10.059	10.164	1.5097	0.594267	1.5097	up	1.05551e-09	1.52677e-07
1803	DPP4	dipeptidyl-peptidase 4	3.63538	3.79552	3.78625	4.25729	4.10245	4.20603	1.3656	0.44954	1.3656	up	7.10358e-05	0.000810801
7769	ZNF226	zinc finger protein 226	7.66432	7.65059	7.68431	7.28099	7.2693	7.30704	-1.30191	-0.38063	1.30191	down	7.9823e-08	4.04711e-06
51123	ZNF706	zinc finger protein 706	9.89645	9.87394	9.91605	9.34146	9.39275	9.37962	-1.43814	-0.524203	1.43814	down	8.53256e-12	4.89732e-09
8766	RAB11A	RAB11A, member RAS oncogene family	8.75319	8.76569	8.83995	8.34682	8.36812	8.45801	-1.31521	-0.395293	1.31521	down	3.99662e-08	2.31581e-06
84333	PCGF5	polycomb group ring finger 5	8.27926	8.2367	8.18884	7.61489	7.63113	7.58419	-1.54206	-0.624863	1.54206	down	9.16787e-11	2.49315e-08
10924	SMPDL3A	sphingomyelin phosphodiesterase, acid-like 3A	6.01194	5.97401	6.05013	6.42274	6.48872	6.50553	1.37583	0.460303	1.37583	up	5.19324e-07	1.71412e-05
7360	UGP2	UDP-glucose pyrophosphorylase 2	10.1993	10.1852	10.175	9.3576	9.35943	9.38968	-1.76245	-0.817583	1.76245	down	6.73985e-15	3.74157e-11
29950	SERTAD1	SERTA domain containing 1	7.46021	7.46773	7.53157	7.78806	7.87356	7.96977	1.31096	0.390627	1.31096	up	7.51768e-07	2.29639e-05
1021	CDK6	cyclin-dependent kinase 6	5.85443	5.87915	5.95171	6.62477	6.52946	6.46256	1.56248	0.643833	1.56248	up	2.62859e-08	1.70378e-06
114569	MAL2	mal, T-cell differentiation protein 2 (gene/pseudogene)	4.74352	4.76437	4.64577	4.19855	4.24161	4.40934	-1.35165	-0.43472	1.35165	down	7.8104e-05	0.000875726
95681	CEP41	centrosomal protein 41kDa	5.88202	5.8126	5.63342	5.32328	5.39319	5.36345	-1.33426	-0.41604	1.33426	down	4.19186e-05	0.000533737
84154	RPF2	ribosome production factor 2 homolog	4.07068	4.58501	4.50979	3.84441	3.92402	3.95657	-1.3949	-0.48016	1.3949	down	0.000780749	0.00546385
26608	TBL2	transducin (beta)-like 2	8.54107	8.48608	8.44412	8.85995	8.87312	8.9563	1.32504	0.406033	1.32504	up	1.84735e-08	1.31801e-06
5828	PEX2	peroxisomal biogenesis factor 2	7.95941	7.94061	7.99447	7.51637	7.5714	7.54119	-1.33964	-0.421843	1.33964	down	1.478e-08	1.11186e-06
254048	UBN2	ubinuclein 2	5.8846	5.6354	5.94356	6.09435	6.21853	6.33545	1.31487	0.394923	1.31487	up	0.000266862	0.00232751
8727	CTNNAL1	catenin alpha-like 1	7.99752	8.00694	7.96114	8.51416	8.30769	8.52366	1.37551	0.45997	1.37551	up	2.16999e-07	8.70085e-06
11169	WDHD1	WD repeat and HMG-box DNA binding protein 1	6.62844	6.64243	6.56573	6.23459	6.20157	6.2494	-1.30467	-0.38368	1.30467	down	2.20948e-06	5.20539e-05
2889	RAPGEF1	Rap guanine nucleotide exchange factor 1	8.50013	8.48703	8.51439	7.68784	7.71207	7.69857	-1.74234	-0.801023	1.74234	down	5.68099e-13	7.21009e-10
5062	PAK2	p21 protein (Cdc42/Rac)-activated kinase 2	8.14347	8.1828	8.23485	7.74318	7.80291	7.79068	-1.32695	-0.408117	1.32695	down	2.64629e-08	1.70962e-06
80821	DDHD1	DDHD domain containing 1	5.20513	5.23615	5.24252	5.61357	5.57326	5.64655	1.30423	0.383193	1.30423	up	2.08861e-05	0.000304574
152559	PAQR3	progestin and adipoQ receptor family member III	5.87675	5.72317	5.82875	5.22469	5.3697	5.27508	-1.43369	-0.519733	1.43369	down	1.97093e-06	4.75763e-05
6383	SDC2	syndecan 2	6.30409	6.40866	6.26643	6.98596	6.94789	7.0443	1.58702	0.666323	1.58702	up	4.52078e-09	4.68067e-07
983	CDK1	cyclin-dependent kinase 1	3.66315	3.96717	4.18217	3.42231	3.66315	3.32408	-1.38286	-0.46765	1.38286	down	0.00176257	0.0104975
29916	SNX11	sorting nexin 11	7.27944	7.21469	7.4549	6.70505	6.67809	6.78814	-1.50794	-0.592583	1.50794	down	8.44135e-08	4.22592e-06
56895	AGPAT4	1-acylglycerol-3-phosphate O-acyltransferase 4	5.97839	6.05177	6.05576	5.35643	5.58398	5.44174	-1.48239	-0.567923	1.48239	down	7.61052e-07	2.31576e-05
143384	CACUL1	CDK2-associated, cullin domain 1	8.85222	8.81017	8.90368	9.30922	9.20986	9.31997	1.34195	0.424327	1.34195	up	8.84534e-09	7.68236e-07
10428	CFDP1	craniofacial development protein 1	8.20957	8.25268	8.15769	7.68712	7.62292	7.69263	-1.45306	-0.53909	1.45306	down	1.06298e-09	1.52938e-07
123606	NIPA1	non imprinted in Prader-Willi/Angelman syndrome 1	5.70356	5.95185	5.9954	5.16805	5.08288	5.52116	-1.54354	-0.62624	1.54354	down	3.14792e-05	0.000423602
26010	SPATS2L	spermatogenesis associated, serine rich 2 like	6.69846	6.71564	6.81701	7.18428	7.27526	7.35857	1.44293	0.529	1.44293	up	9.40942e-08	4.63915e-06
170691	ADAMTS17	ADAM metallopeptidase with thrombospondin type 1 motif 17	4.273	4.31165	4.60952	4.91661	4.74444	4.7332	1.31953	0.400027	1.31953	up	0.000787718	0.00549991
4520	MTF1	metal-regulatory transcription factor 1	4.70352	4.7283	4.70021	5.31074	5.16246	5.3125	1.46533	0.551223	1.46533	up	1.57143e-06	4.02202e-05
901	CCNG2	cyclin G2	7.3322	7.45403	7.45704	7.05827	6.93133	6.99839	-1.33647	-0.418427	1.33647	down	6.34566e-07	2.0183e-05
221079	ARL5B	ADP ribosylation factor like GTPase 5B	5.53938	5.51802	5.64218	5.90031	5.83583	6.2064	1.33267	0.41432	1.33267	up	0.000246033	0.00218607
5690	PSMB2	proteasome subunit beta 2	10.9106	10.9303	10.9329	10.3011	10.3039	10.3195	-1.53303	-0.616383	1.53303	down	4.21001e-14	1.2292e-10
7746	ZSCAN9	zinc finger and SCAN domain containing 9	4.9912	4.77554	4.92465	5.16459	5.18896	5.48737	1.30421	0.383177	1.30421	up	0.000852047	0.00587297
115123	MARCH3	membrane associated ring-CH-type finger 3	6.8238	6.82142	6.7679	7.4121	7.52825	7.55396	1.61746	0.69373	1.61746	up	6.29137e-10	1.04885e-07
9100	USP10	ubiquitin specific peptidase 10	8.47204	8.45501	8.50735	7.9329	8.02676	7.97023	-1.41569	-0.501503	1.41569	down	9.97324e-10	1.48071e-07
1027	CDKN1B	cyclin-dependent kinase inhibitor 1B (p27, Kip1)	6.42342	6.66405	6.47147	7.09463	7.13182	7.15834	1.5248	0.608617	1.5248	up	6.43045e-08	3.42818e-06
11340	EXOSC8	exosome component 8	10.7072	10.6806	10.6741	10.2994	10.2602	10.2545	-1.33412	-0.415893	1.33412	down	3.02064e-11	1.2252e-08
54541	DDIT4	DNA damage inducible transcript 4	9.42637	9.43425	9.45366	8.97031	8.96113	9.0194	-1.37029	-0.45448	1.37029	down	1.44141e-10	3.56672e-08
151887	CCDC80	coiled-coil domain containing 80	7.11036	7.15168	7.20474	7.56188	7.66647	7.65137	1.38605	0.47098	1.38605	up	3.76657e-08	2.22177e-06
7035	TFPI	tissue factor pathway inhibitor	9.81856	9.85062	9.81108	10.2791	10.2022	10.252	1.33579	0.417693	1.33579	up	1.91189e-10	4.27395e-08
5923	RASGRF1	Ras protein specific guanine nucleotide releasing factor 1	3.90034	4.00682	4.09129	4.23087	4.48796	4.49174	1.32321	0.40404	1.32321	up	0.000475612	0.00369228
5817	PVR	poliovirus receptor	7.23813	7.31799	7.27442	7.65577	7.63908	7.77042	1.33014	0.411577	1.33014	up	2.43168e-07	9.56722e-06
22823	MTF2	metal response element binding transcription factor 2	8.00403	7.8731	7.8633	8.38638	8.2973	8.40472	1.3654	0.449323	1.3654	up	6.27002e-08	3.37005e-06
79154	DHRS11	dehydrogenase/reductase (SDR family) member 11	6.14619	6.16222	6.32582	5.54155	5.75848	5.61507	-1.48766	-0.573043	1.48766	down	1.14374e-06	3.16452e-05
51126	NAA20	N(alpha)-acetyltransferase 20, NatB catalytic subunit	10.0612	10.1049	10.0192	9.63042	9.60264	9.69156	-1.3381	-0.42019	1.3381	down	1.11448e-09	1.58869e-07
1289	COL5A1	collagen, type V, alpha 1	7.48352	7.39959	7.56237	7.95815	8.04684	8.0151	1.4388	0.52487	1.4388	up	1.26311e-08	9.97907e-07
5682	PSMA1	proteasome subunit alpha 1	6.13872	6.25051	6.36131	5.66217	5.69412	5.69032	-1.48244	-0.567977	1.48244	down	3.66628e-07	1.32215e-05
9987	HNRNPDL	heterogeneous nuclear ribonucleoprotein D like	8.25124	8.21391	8.2156	7.69282	7.70153	7.7321	-1.43207	-0.5181	1.43207	down	4.14631e-10	7.84291e-08
57574	MARCH4	membrane associated ring-CH-type finger 4	7.40821	7.44866	7.58271	6.67409	6.81623	6.91318	-1.60069	-0.678693	1.60069	down	2.52268e-08	1.65261e-06
79647	AKIRIN1	akirin 1	6.76576	6.76685	6.77441	7.21725	7.17048	7.09399	1.31182	0.391567	1.31182	up	6.39315e-07	2.03012e-05
23731	TMEM245	transmembrane protein 245	7.99752	8.00694	7.96114	8.51416	8.30769	8.52366	1.37551	0.45997	1.37551	up	2.16999e-07	8.70085e-06
3078	CFHR1	complement factor H-related 1	5.19917	5.27933	5.24723	5.59149	5.72404	5.64559	1.33034	0.411797	1.33034	up	1.60328e-05	0.000245924
25915	NDUFAF3	NADH dehydrogenase (ubiquinone) complex I, assembly factor 3	9.12398	9.14544	9.16128	9.57365	9.6523	9.59131	1.37763	0.462187	1.37763	up	1.68101e-10	3.96033e-08
3934	LCN2	lipocalin 2	6.91601	6.8648	6.90871	6.45494	6.50934	6.5839	-1.30174	-0.380447	1.30174	down	2.16567e-06	5.12055e-05
79648	MCPH1	microcephalin 1	4.80948	5.03708	5.14894	5.33032	5.3902	5.59383	1.35624	0.439617	1.35624	up	0.000298405	0.00255338
7447	VSNL1	visinin like 1	5.20204	5.09667	5.0635	5.35349	5.59567	5.64222	1.32843	0.409723	1.32843	up	0.000164606	0.00158316
56941	HMCES	5-hydroxymethylcytosine (hmC) binding, ES cell-specific	6.02631	6.19965	6.03827	5.38166	5.43718	5.52338	-1.55905	-0.64067	1.55905	down	1.56852e-07	6.87981e-06
9522	SCAMP1	secretory carrier membrane protein 1	6.26839	6.10909	6.43746	5.35013	5.31444	5.45582	-1.86372	-0.898183	1.86372	down	1.56597e-08	1.16029e-06
2074	ERCC6	excision repair cross-complementation group 6	4.35659	4.11083	4.10492	4.4409	4.49347	4.83168	1.31759	0.397903	1.31759	up	0.00198972	0.011589
25798	BRI3	brain protein I3	5.51281	5.56043	5.5725	5.9244	5.92921	5.95088	1.30699	0.38625	1.30699	up	9.00032e-06	0.000156893
196264	MPZL3	myelin protein zero-like 3	5.70304	5.60623	5.86008	4.96613	5.30675	5.2371	-1.46726	-0.553123	1.46726	down	2.63088e-05	0.000368623
400892	BCRP2	breakpoint cluster region pseudogene 2	6.20584	6.27253	6.42768	6.73442	6.75321	6.82092	1.38271	0.4675	1.38271	up	1.78703e-06	4.41832e-05
55238	SLC38A7	solute carrier family 38, member 7	6.63939	6.7224	6.82897	7.10956	7.20137	7.03149	1.30485	0.383887	1.30485	up	1.06274e-05	0.000178683
8697	CDC23	cell division cycle 23	6.2196	6.3561	6.34184	5.82205	5.83085	5.88467	-1.37553	-0.45999	1.37553	down	1.44913e-06	3.78582e-05
63939	FAM217B	family with sequence similarity 217 member B	6.54608	6.57914	6.49256	6.10648	5.95992	6.21494	-1.36177	-0.44548	1.36177	down	6.99081e-06	0.000128767
7050	TGIF1	TGFB-induced factor homeobox 1	7.44866	7.43089	7.33585	7.79876	7.82055	7.89035	1.34856	0.43142	1.34856	up	8.24481e-08	4.1641e-06
2332	FMR1	fragile X mental retardation 1	5.85443	5.83567	5.98652	5.44926	5.53976	5.52656	-1.30768	-0.387013	1.30768	down	2.88755e-05	0.000398483
331	XIAP	X-linked inhibitor of apoptosis, E3 ubiquitin protein ligase	8.14496	8.30762	8.16753	7.68392	7.69107	7.71371	-1.42451	-0.51047	1.42451	down	1.03585e-08	8.65277e-07
2737	GLI3	GLI family zinc finger 3	6.81566	6.86646	6.83559	6.51178	6.34346	6.50879	-1.30546	-0.38456	1.30546	down	5.81456e-06	0.000111268
157567	ANKRD46	ankyrin repeat domain 46	5.4538	5.34071	5.47652	6.10308	6.1434	6.28809	1.68706	0.754513	1.68706	up	1.97007e-08	1.39157e-06
25976	TIPARP	TCDD-inducible poly(ADP-ribose) polymerase	5.73024	5.81076	5.68525	6.10703	6.25288	6.38827	1.4214	0.50731	1.4214	up	5.03979e-06	9.9971e-05
90333	ZNF468	zinc finger protein 468	5.33484	5.36793	5.33134	4.57452	4.97095	4.8341	-1.46562	-0.551513	1.46562	down	2.31292e-05	0.000330306
153222	CREBRF	CREB3 regulatory factor	4.76752	5.14233	5.11383	5.47801	5.46311	5.45682	1.37372	0.458087	1.37372	up	0.000151572	0.0014864
55207	ARL8B	ADP ribosylation factor like GTPase 8B	7.736	7.71556	7.73332	7.15665	7.19139	7.28552	-1.43108	-0.517107	1.43108	down	7.20338e-09	6.63819e-07
144203	OVOS2	ovostatin 2	6.13823	6.19743	6.36058	5.57059	5.44598	5.72858	-1.56956	-0.650363	1.56956	down	8.24711e-07	2.46374e-05
90693	CCDC126	coiled-coil domain containing 126	6.19455	6.20015	6.33731	6.66183	6.53936	6.74932	1.32516	0.406167	1.32516	up	1.44158e-05	0.000227051
3696	ITGB8	integrin beta 8	3.67396	3.8566	3.66507	4.12067	4.10388	4.26733	1.34918	0.432083	1.34918	up	0.000151975	0.0014885
25957	PNISR	PNN-interacting serine/arginine-rich protein	6.39195	6.48275	6.39195	5.98848	5.88828	6.08192	-1.35284	-0.43599	1.35284	down	4.69443e-06	9.44261e-05
152006	RNF38	ring finger protein 38	7.65137	7.6268	7.70008	8.08354	8.0138	8.16167	1.34436	0.42692	1.34436	up	7.82435e-08	4.00835e-06
58472	SQRDL	sulfide quinone reductase-like (yeast)	7.45021	7.48722	7.46986	6.05106	6.33429	6.14984	-2.44647	-1.2907	2.44647	down	6.03992e-12	3.81976e-09
5887	RAD23B	RAD23 homolog B, nucleotide excision repair protein	8.81136	8.77319	8.76496	8.34966	8.3462	8.35031	-1.35139	-0.434447	1.35139	down	7.65602e-10	1.20971e-07
441168	FAM26F	family with sequence similarity 26 member F	5.40189	5.241	5.58067	4.96808	4.91296	4.95453	-1.37808	-0.462663	1.37808	down	6.02796e-05	0.000710522
3921	RPSA	ribosomal protein SA	5.40649	5.32816	5.41492	5.85674	5.74364	5.89097	1.36345	0.44726	1.36345	up	6.41126e-06	0.000120231
163882	CNST	consortin, connexin sorting protein	4.36532	4.347	4.24194	3.72679	3.98138	3.87086	-1.37403	-0.45841	1.37403	down	8.40578e-05	0.000929917
84986	ARHGAP19	Rho GTPase activating protein 19	6.78168	6.77743	6.83357	6.09172	6.13647	6.19819	-1.57509	-0.655433	1.57509	down	3.69389e-09	4.00365e-07
9218	VAPA	VAMP associated protein A	8.22921	8.32875	8.19734	7.656	7.86444	7.69009	-1.42892	-0.514923	1.42892	down	1.01444e-07	4.92742e-06
131578	LRRC15	leucine rich repeat containing 15	3.55908	3.64441	3.78763	3.95067	4.21135	4.03279	1.32063	0.40123	1.32063	up	0.000579227	0.00431858
55255	WDR41	WD repeat domain 41	7.23065	7.32278	7.37451	6.82897	6.79263	6.89309	-1.38615	-0.471083	1.38615	down	1.47013e-07	6.57283e-06
64848	YTHDC2	YTH domain containing 2	6.21064	6.27933	6.07919	5.7331	5.48728	5.70374	-1.46241	-0.548347	1.46241	down	3.69451e-06	7.79393e-05
6652	SORD	sorbitol dehydrogenase	8.56206	8.54006	8.559	7.92876	8.05076	8.0391	-1.46155	-0.5475	1.46155	down	6.38958e-10	1.05627e-07
254394	MCM9	minichromosome maintenance 9 homologous recombination repair factor	5.65542	5.52398	5.66909	5.0618	5.26643	5.29832	-1.32621	-0.407313	1.32621	down	9.91915e-05	0.00106135
11259	FILIP1L	filamin A interacting protein 1-like	4.82239	4.88705	4.79951	5.37318	5.31671	5.32288	1.41546	0.501273	1.41546	up	2.31567e-06	5.38144e-05
401152	C4orf3	chromosome 4 open reading frame 3	6.92167	6.83743	6.63317	6.42737	6.37328	6.32344	-1.34046	-0.422727	1.34046	down	1.81733e-05	0.000271764
55304	SPTLC3	serine palmitoyltransferase, long chain base subunit 3	5.71311	5.72234	5.44011	6.04306	5.98902	6.05676	1.32356	0.404427	1.32356	up	9.13475e-05	0.000992811
55742	PARVA	parvin alpha	7.00236	7.03858	6.96028	6.53414	6.64919	6.58276	-1.33026	-0.41171	1.33026	down	6.82389e-07	2.13417e-05
10196	PRMT3	protein arginine methyltransferase 3	6.69224	6.78042	6.79421	6.32386	6.27676	6.32959	-1.36184	-0.445553	1.36184	down	4.06921e-07	1.43201e-05
6009	RHEB	Ras homolog enriched in brain	8.75051	8.71945	8.79005	8.29797	8.39934	8.30782	-1.33635	-0.418293	1.33635	down	1.15123e-08	9.43185e-07
2200	FBN1	fibrillin 1	5.47025	5.62032	5.47216	6.12594	6.22928	6.24479	1.60113	0.679093	1.60113	up	4.25922e-08	2.44992e-06
6668	SP2	Sp2 transcription factor	5.0222	5.03096	5.22063	5.51383	5.50886	5.77463	1.42192	0.507843	1.42192	up	3.00677e-05	0.000409053
100131211	NEMP2	nuclear envelope integral membrane protein 2	6.24313	6.33666	6.39399	5.87825	5.89944	5.99398	-1.32015	-0.400703	1.32015	down	9.64401e-06	0.000165909
1002	CDH4	cadherin 4, type 1, R-cadherin (retinal)	8.62128	8.57636	8.62066	8.98205	9.06459	8.99599	1.32695	0.40811	1.32695	up	3.73994e-09	4.03135e-07
5621	PRNP	prion protein	10.0683	10.098	10.0909	9.6425	9.68562	9.65555	-1.34213	-0.42452	1.34213	down	5.92545e-11	1.79332e-08
219771	CCNY	cyclin Y	8.495	8.46989	8.40867	7.79061	7.8389	7.87206	-1.54114	-0.623997	1.54114	down	9.1108e-11	2.49315e-08
132320	SCLT1	sodium channel and clathrin linker 1	5.58883	5.57215	5.4769	5.02926	5.01883	5.13718	-1.39881	-0.484203	1.39881	down	4.35184e-06	8.90373e-05
144245	ALG10B	ALG10B, alpha-1,2-glucosyltransferase	3.68897	4.03479	3.86257	3.42334	3.41815	3.35956	-1.37722	-0.46176	1.37722	down	0.000183759	0.00172962
23283	CSTF2T	cleavage stimulation factor, 3' pre-RNA, subunit 2, tau variant	6.40697	6.455	6.52472	6.04492	6.0478	6.11332	-1.31362	-0.39355	1.31362	down	4.15513e-06	8.57709e-05
7594	ZNF43	zinc finger protein 43	4.41217	4.68963	4.18383	4.83963	4.78211	4.97179	1.35282	0.435967	1.35282	up	0.00116251	0.00752016
2733	GLE1	GLE1, RNA export mediator	8.88269	8.83542	8.87619	8.28954	8.22576	8.36242	-1.48678	-0.572193	1.48678	down	2.81539e-10	5.82993e-08
3669	ISG20	interferon stimulated exonuclease gene 20kDa	5.56638	5.47601	5.56999	5.05216	5.21041	5.15542	-1.3178	-0.39813	1.3178	down	3.93914e-05	0.000507969
55105	GPATCH2	G-patch domain containing 2	4.65557	4.67974	4.752	4.02595	3.45109	3.95011	-1.84897	-0.88672	1.84897	down	3.38274e-06	7.24104e-05
9815	GIT2	G protein-coupled receptor kinase interacting ArfGAP 2	8.49395	8.54732	8.52429	8.93313	9.02451	8.94827	1.363	0.446783	1.363	up	1.74361e-09	2.23455e-07
116064	LRRC58	leucine rich repeat containing 58	8.224	8.26299	8.25129	7.54343	7.55093	7.57659	-1.61229	-0.68911	1.61229	down	9.78523e-12	5.27384e-09
55839	CENPN	centromere protein N	6.89499	6.8084	7.0676	7.31304	7.2882	7.30776	1.30074	0.379337	1.30074	up	1.13757e-05	0.000187895
7903	ST8SIA4	ST8 alpha-N-acetyl-neuraminide alpha-2,8-sialyltransferase 4	4.26733	4.36501	4.40909	4.53823	4.8084	4.91237	1.32488	0.405857	1.32488	up	0.000655876	0.00475928
138639	PTPDC1	protein tyrosine phosphatase domain containing 1	5.34381	5.27056	5.48206	4.65675	4.64383	4.64362	-1.64423	-0.71741	1.64423	down	9.97469e-08	4.863e-06
26001	RNF167	ring finger protein 167	8.17806	8.23044	8.13728	7.4266	7.42838	7.44101	-1.68171	-0.74993	1.68171	down	8.72116e-12	4.90179e-09
9353	SLIT2	slit guidance ligand 2	6.57022	6.76489	6.75743	7.5569	7.66438	7.72576	1.93388	0.9515	1.93388	up	1.62733e-10	3.90076e-08
8140	SLC7A5	solute carrier family 7 (amino acid transporter light chain, L system), member 5	9.22896	9.29671	9.18844	8.67254	8.70331	8.73604	-1.44801	-0.534073	1.44801	down	1.82467e-10	4.17384e-08
54802	TRIT1	tRNA isopentenyltransferase 1	4.55223	4.55223	4.55638	4.1953	4.09703	4.12067	-1.33417	-0.415947	1.33417	down	4.39759e-05	0.000553317
23650	TRIM29	tripartite motif containing 29	4.25029	4.13341	3.70722	4.25029	4.67223	4.41154	1.33273	0.41438	1.33273	up	0.00669654	0.0302455
79621	RNASEH2B	ribonuclease H2 subunit B	5.08856	5.50812	5.518	4.84821	5.17055	4.92553	-1.31051	-0.39013	1.31051	down	0.00339734	0.0176665
23231	SEL1L3	sel-1 suppressor of lin-12-like 3 (C. elegans)	6.43503	6.50854	6.36906	5.43535	5.57592	5.83301	-1.76882	-0.822783	1.76882	down	1.20278e-07	5.58702e-06
26953	RANBP6	RAN binding protein 6	6.52394	6.5149	6.39218	6.04754	5.97259	5.93256	-1.40715	-0.492777	1.40715	down	6.4496e-07	2.0431e-05
102723996	LOC102723996	ICOS ligand	4.06927	4.02564	4.08581	4.72624	4.21832	4.3942	1.30678	0.386013	1.30678	up	0.0027543	0.0149717
94081	SFXN1	sideroflexin 1	7.92243	7.97135	7.97624	7.30398	7.47129	7.39378	-1.48143	-0.56699	1.48143	down	4.21283e-09	4.45785e-07
51527	GSKIP	GSK3B interacting protein	7.98045	8.05439	8.11382	8.40232	8.44753	8.44795	1.30409	0.383047	1.30409	up	8.42212e-08	4.22592e-06
5167	ENPP1	ectonucleotide pyrophosphatase/phosphodiesterase 1	5.81792	5.87818	6.00076	6.14802	6.33889	6.37613	1.30924	0.388727	1.30924	up	7.24207e-05	0.000822363
138199	CARNMT1	carnosine N-methyltransferase 1	6.89162	6.9189	6.73559	7.44609	7.16891	7.32337	1.37944	0.464087	1.37944	up	6.1832e-06	0.000117005
51218	GLRX5	glutaredoxin 5	10.0105	10.0407	10.1358	9.35033	9.41389	9.3543	-1.6127	-0.68948	1.6127	down	4.94261e-12	3.47253e-09
10205	MPZL2	myelin protein zero-like 2	4.98992	4.81873	5.01819	4.34275	4.56684	4.53396	-1.37659	-0.461097	1.37659	down	7.41635e-05	0.000839197
4925	NUCB2	nucleobindin 2	8.54626	8.5624	8.50912	8.98485	9.00513	9.04821	1.38844	0.47347	1.38844	up	3.34535e-10	6.69076e-08
10620	ARID3B	AT-rich interaction domain 3B	6.17797	6.19248	6.21027	6.75909	6.75943	6.73681	1.47243	0.558203	1.47243	up	1.23944e-08	9.89135e-07
11161	C14orf1	chromosome 14 open reading frame 1	8.56923	8.61832	8.67297	8.12829	8.14858	8.20663	-1.3746	-0.459007	1.3746	down	4.51123e-09	4.68067e-07
64115	C10orf54	chromosome 10 open reading frame 54	6.05126	6.02253	6.10582	6.57336	6.50666	6.63916	1.4272	0.51319	1.4272	up	2.01547e-07	8.2521e-06
7398	USP1	ubiquitin specific peptidase 1	8.72763	8.7133	8.6557	8.09289	8.16141	8.15664	-1.47621	-0.561897	1.47621	down	1.43214e-10	3.56672e-08
3839	KPNA3	karyopherin alpha 3 (importin alpha 4)	9.45522	9.4622	9.39874	9.07719	8.91695	9.04339	-1.3437	-0.42621	1.3437	down	2.10941e-08	1.45238e-06
5768	QSOX1	quiescin sulfhydryl oxidase 1	7.27067	7.3688	7.48396	7.74488	7.88878	7.73627	1.33376	0.4155	1.33376	up	2.80841e-06	6.27808e-05
23176	SEPT8	septin 8	4.09314	4.40375	4.45061	4.7054	4.6943	4.95599	1.38453	0.469397	1.38453	up	0.000391155	0.00316203
5583	PRKCH	protein kinase C, eta	4.40525	4.26733	4.37305	3.85593	3.90908	3.79022	-1.41108	-0.4968	1.41108	down	1.48131e-05	0.000231456
5901	RAN	RAN, member RAS oncogene family	11.9783	11.9815	11.9798	11.4188	11.4415	11.4088	-1.47103	-0.556823	1.47103	down	2.27663e-14	8.1429e-11
285550	FAM200B	family with sequence similarity 200 member B	6.22286	6.38263	6.37179	6.70993	6.72808	6.89693	1.36846	0.452553	1.36846	up	4.22962e-06	8.70007e-05
56261	GPCPD1	glycerophosphocholine phosphodiesterase 1	6.54881	6.63045	6.71848	7.10878	7.19335	7.19743	1.44788	0.53394	1.44788	up	6.78954e-08	3.57601e-06
140609	NEK7	NIMA-related kinase 7	5.38741	5.28806	5.38373	4.56259	4.74853	4.97558	-1.50612	-0.590833	1.50612	down	1.52896e-05	0.000236925
23179	RGL1	ral guanine nucleotide dissociation stimulator-like 1	6.64704	6.69419	6.63456	7.02448	7.07329	7.12413	1.33364	0.41537	1.33364	up	3.61028e-07	1.30442e-05
169611	OLFML2A	olfactomedin like 2A	8.02207	7.97924	8.16352	7.27857	7.38385	7.34218	-1.64727	-0.720077	1.64727	down	5.8744e-10	1.00548e-07
144132	DNHD1	dynein heavy chain domain 1	3.58303	3.94671	4.01827	4.37251	4.18611	4.284	1.34867	0.431537	1.34867	up	0.00108827	0.00713258
3283	HSD3B1	hydroxy-delta-5-steroid dehydrogenase, 3 beta- and steroid delta-isomerase 1	4.18247	4.07618	4.00622	4.63803	4.68126	4.94002	1.58536	0.664813	1.58536	up	3.25857e-06	7.04038e-05
57552	NCEH1	neutral cholesterol ester hydrolase 1	9.08596	9.18411	9.12518	9.52154	9.4999	9.55902	1.31501	0.39507	1.31501	up	3.62275e-09	3.93739e-07
9603	NFE2L3	nuclear factor, erythroid 2 like 3	7.45609	7.56944	7.47511	6.79766	6.63442	6.84019	-1.67341	-0.74279	1.67341	down	2.15055e-09	2.5734e-07
397	ARHGDIB	Rho GDP dissociation inhibitor (GDI) beta	10.2432	10.2412	10.2782	10.6554	10.6797	10.6288	1.31992	0.400453	1.31992	up	6.54391e-11	1.90714e-08
3017	HIST1H2BD	histone cluster 1, H2bd	7.99668	8.00481	8.02845	8.60645	8.60797	8.65845	1.53083	0.61431	1.53083	up	1.95728e-11	8.95435e-09
51400	PPME1	protein phosphatase methylesterase 1	9.23799	9.16407	9.21567	9.64539	9.7044	9.6443	1.37439	0.458787	1.37439	up	2.5665e-10	5.37108e-08
60526	LDAH	lipid droplet associated hydrolase	4.099	4.59359	4.39622	3.93279	3.78847	4.07252	-1.3488	-0.431677	1.3488	down	0.00190335	0.0111769
6747	SSR3	signal sequence receptor, gamma (translocon-associated protein gamma)	8.26299	8.24593	8.3052	8.6349	8.66132	8.68704	1.31013	0.389713	1.31013	up	7.62503e-09	6.83369e-07
10458	BAIAP2	BAI1-associated protein 2	4.2286	4.33792	4.26016	4.43045	4.93942	4.62567	1.31005	0.38962	1.31005	up	0.00252467	0.0139657
6158	RPL28	ribosomal protein L28	8.00327	7.94482	7.93052	8.6666	8.64688	8.68229	1.63096	0.70572	1.63096	up	4.43704e-12	3.19915e-09
140707	BRI3BP	BRI3 binding protein	6.13503	6.08089	6.13412	5.4423	5.59342	5.68089	-1.45849	-0.544477	1.45849	down	1.10604e-06	3.08843e-05
5965	RECQL	RecQ helicase-like	7.27308	7.32765	7.23599	6.30144	6.46011	6.43942	-1.83857	-0.878583	1.83857	down	1.14405e-10	2.96128e-08
201164	PLD6	phospholipase D family member 6	7.17083	7.21822	7.30279	6.74692	6.89754	6.84001	-1.32176	-0.402457	1.32176	down	1.78781e-06	4.41832e-05
56648	EIF5A2	eukaryotic translation initiation factor 5A2	5.04598	4.8694	5.06004	5.2852	5.44926	5.54889	1.35283	0.435977	1.35283	up	9.99908e-05	0.00106671
2152	F3	coagulation factor III (thromboplastin, tissue factor)	9.50753	9.51752	9.44873	10.0325	10.0478	9.98964	1.44597	0.532033	1.44597	up	1.55353e-11	7.64025e-09
3308	HSPA4	heat shock protein family A (Hsp70) member 4	7.10461	7.07448	7.11072	6.72046	6.66736	6.73438	-1.30967	-0.389203	1.30967	down	4.30605e-07	1.49927e-05
574040	SNORA6	small nucleolar RNA, H/ACA box 6	5.40649	5.32816	5.41492	5.85674	5.74364	5.89097	1.36345	0.44726	1.36345	up	6.41126e-06	0.000120231
139886	SPIN4	spindlin family member 4	7.08949	7.06631	7.13701	6.73318	6.62099	6.71229	-1.32757	-0.408783	1.32757	down	5.84208e-07	1.88371e-05
8683	SRSF9	serine/arginine-rich splicing factor 9	4.76119	4.63811	4.58944	4.20672	4.39324	4.18683	-1.3201	-0.40065	1.3201	down	0.000236947	0.00212259
56063	TMEM234	transmembrane protein 234	4.05654	4.05487	3.97381	4.63914	4.67993	4.35777	1.44447	0.53054	1.44447	up	3.70394e-05	0.000483663
168850	ZNF800	zinc finger protein 800	5.61747	5.45714	5.15988	5.86694	5.69432	5.88493	1.32308	0.4039	1.32308	up	0.000981615	0.00657933
153396	TMEM161B	transmembrane protein 161B	5.86647	5.93862	6.11473	5.25625	5.40306	5.27928	-1.58053	-0.66041	1.58053	down	3.43543e-07	1.255e-05
80315	CPEB4	cytoplasmic polyadenylation element binding protein 4	7.07463	7.16565	6.83189	7.45484	7.31052	7.4991	1.31716	0.39743	1.31716	up	8.15164e-05	0.000906752
92241	RCSD1	RCSD domain containing 1	3.70235	3.93745	3.6197	4.60886	4.24312	4.53502	1.63486	0.709167	1.63486	up	9.93976e-06	0.000169588
7873	MANF	mesencephalic astrocyte-derived neurotrophic factor	10.7588	10.8094	10.7699	9.77067	9.76617	9.86973	-1.96863	-0.97719	1.96863	down	7.60792e-15	3.74157e-11
4175	MCM6	minichromosome maintenance complex component 6	5.22041	5.15512	5.19653	5.47316	5.74461	5.67781	1.35771	0.441173	1.35771	up	3.85419e-05	0.000498813
4597	MVD	mevalonate diphosphate decarboxylase	8.26197	8.22787	8.29272	7.88813	7.91321	7.83276	-1.30389	-0.38282	1.30389	down	4.1992e-08	2.41894e-06
100532736	MINOS1-NBL1	MINOS1-NBL1 readthrough	7.43081	7.43503	7.53903	6.95085	6.98292	6.9467	-1.42221	-0.508133	1.42221	down	1.46084e-08	1.1041e-06
6815	STYX	serine/threonine/tyrosine interacting protein	6.78227	6.64953	6.57952	7.11476	7.13725	7.08899	1.35964	0.443227	1.35964	up	9.01895e-07	2.63431e-05
3836	KPNA1	karyopherin alpha 1	7.16833	7.2483	7.14886	7.61641	7.60746	7.69582	1.36737	0.4514	1.36737	up	5.57164e-08	3.04883e-06
81573	ANKRD13C	ankyrin repeat domain 13C	4.20764	4.44378	4.54088	4.79076	4.9143	5.08449	1.44635	0.532417	1.44635	up	7.75477e-05	0.00087073
57198	ATP8B2	ATPase, aminophospholipid transporter, class I, type 8B, member 2	5.00976	4.94005	4.86324	4.49702	4.26733	4.65844	-1.37881	-0.46342	1.37881	down	0.000199468	0.00184663
8942	KYNU	kynureninase	6.75201	6.71447	6.67111	6.20546	6.23934	6.42138	-1.34146	-0.423803	1.34146	down	5.87183e-06	0.000112201
5906	RAP1A	RAP1A, member of RAS oncogene family	11.7341	11.7471	11.8171	12.9447	12.9855	12.9547	2.29024	1.1955	2.29024	up	8.5335e-18	3.35742e-13
3915	LAMC1	laminin subunit gamma 1	7.38773	7.36645	7.52305	6.78638	6.83957	6.80966	-1.53036	-0.613873	1.53036	down	4.68536e-09	4.82568e-07
51114	ZDHHC9	zinc finger, DHHC-type containing 9	6.35246	6.2151	6.2976	5.94875	5.89564	5.63517	-1.37732	-0.461867	1.37732	down	3.01836e-05	0.00041031
1385	CREB1	cAMP responsive element binding protein 1	7.01192	6.95835	6.84161	6.44886	6.58196	6.50687	-1.34232	-0.42473	1.34232	down	2.36341e-06	5.4762e-05
7637	ZNF84	zinc finger protein 84	6.0249	5.93879	6.04146	6.33323	6.38832	6.52096	1.33095	0.412453	1.33095	up	8.90565e-06	0.000155518
23592	LEMD3	LEM domain containing 3	5.08856	5.10692	5.19073	4.749	4.72818	4.72544	-1.31451	-0.39453	1.31451	down	4.02828e-05	0.00051743
140862	ISM1	isthmin 1, angiogenesis inhibitor	3.29839	3.59706	3.67052	4.00023	4.0984	4.16634	1.48076	0.566333	1.48076	up	4.93023e-05	0.000605604
54059	YBEY	ybeY metallopeptidase (putative)	6.20496	6.37527	6.47334	6.80864	6.67697	6.73893	1.31069	0.390323	1.31069	up	3.54005e-05	0.000467224
799	CALCR	calcitonin receptor	3.45179	3.32059	3.44815	4.62344	4.79892	4.82187	2.53368	1.34123	2.53368	up	1.57239e-10	3.81877e-08
950	SCARB2	scavenger receptor class B, member 2	5.01845	5.17646	5.08826	3.77817	3.7591	3.97095	-2.39216	-1.25832	2.39216	down	3.27169e-10	6.6011e-08
3134	HLA-F	major histocompatibility complex, class I, F	6.87103	6.85495	6.8636	7.45028	7.28368	7.50686	1.46451	0.550413	1.46451	up	6.62025e-08	3.51983e-06
10221	TRIB1	tribbles pseudokinase 1	7.39456	7.34345	7.42185	7.79364	7.82029	7.79905	1.3358	0.417707	1.3358	up	2.85579e-08	1.80931e-06
330	BIRC3	baculoviral IAP repeat containing 3	7.46388	7.52726	7.39304	7.97469	7.83321	7.84035	1.33919	0.421357	1.33919	up	4.04651e-07	1.42785e-05
9783	RIMS3	regulating synaptic membrane exocytosis 3	5.75063	5.74234	5.74978	5.27455	5.22857	5.40161	-1.36226	-0.446007	1.36226	down	7.51006e-06	0.000135851
9975	NR1D2	nuclear receptor subfamily 1 group D member 2	5.66756	5.80368	5.6651	5.38166	4.96838	5.49504	-1.34763	-0.43042	1.34763	down	0.00121652	0.00779017
2776	GNAQ	guanine nucleotide binding protein (G protein), q polypeptide	6.83203	6.8247	6.78899	6.40088	6.46157	6.44625	-1.30045	-0.379007	1.30045	down	1.23619e-06	3.35093e-05
126549	ANKLE1	ankyrin repeat and LEM domain containing 1	3.16037	3.53162	3.71599	3.78372	3.9162	4.10882	1.38216	0.46692	1.38216	up	0.00217116	0.0123962
1595	CYP51A1	cytochrome P450, family 51, subfamily A, polypeptide 1	9.10426	9.06173	9.10966	8.61245	8.61493	8.53148	-1.41971	-0.505597	1.41971	down	2.56148e-10	5.37108e-08
7112	TMPO	thymopoietin	8.19011	8.23753	8.30855	7.39183	7.47119	7.39612	-1.77237	-0.825683	1.77237	down	8.98915e-12	4.98126e-09
51665	ASB1	ankyrin repeat and SOCS box containing 1	7.5194	7.47048	7.5392	6.90973	7.08898	6.9592	-1.43766	-0.523723	1.43766	down	4.42247e-08	2.52537e-06
84747	UNC119B	unc-119 lipid binding chaperone B	8.7102	8.72007	8.73147	7.85955	8.08091	8.11105	-1.62835	-0.70341	1.62835	down	1.9191e-09	2.3894e-07
5274	SERPINI1	serpin peptidase inhibitor, clade I (neuroserpin), member 1	5.08107	5.28803	5.2944	5.50878	5.66345	5.68392	1.31727	0.39755	1.31727	up	0.000134441	0.00135349
10075	HUWE1	HECT, UBA and WWE domain containing 1, E3 ubiquitin protein ligase	4.39097	4.30951	4.7332	4.78994	4.96558	5.09769	1.38816	0.473177	1.38816	up	0.000591886	0.00439629
57486	NLN	neurolysin (metallopeptidase M3 family)	7.54094	7.58916	7.58916	6.97972	7.03567	7.0365	-1.46997	-0.55579	1.46997	down	1.65869e-09	2.13966e-07
23173	METAP1	methionyl aminopeptidase 1	9.06038	9.11943	9.04129	8.4641	8.42384	8.46181	-1.54091	-0.623783	1.54091	down	1.07888e-11	5.58519e-09
56852	RAD18	RAD18, E3 ubiquitin protein ligase	6.83271	6.88195	6.93701	6.39844	6.48198	6.55496	-1.32448	-0.40543	1.32448	down	2.45383e-06	5.64762e-05
23621	BACE1	beta-site APP-cleaving enzyme 1	7.1741	7.24834	7.21131	7.55372	7.52766	7.69945	1.30347	0.38236	1.30347	up	1.57403e-06	4.02395e-05
83640	FAM103A1	family with sequence similarity 103 member A1	7.08403	7.11281	7.09891	6.5902	6.55029	6.72669	-1.39107	-0.47619	1.39107	down	2.46812e-07	9.69121e-06
27295	PDLIM3	PDZ and LIM domain 3	5.31074	5.30018	5.46568	4.25656	4.07196	4.49403	-2.12091	-1.08468	2.12091	down	2.22498e-08	1.50768e-06
7402	UTRN	utrophin	8.24605	8.22732	8.1914	8.57255	8.69415	8.63269	1.3301	0.41154	1.3301	up	1.8213e-08	1.30523e-06
9627	SNCAIP	synuclein alpha interacting protein	5.29342	5.38206	5.47903	5.81474	5.82845	5.8779	1.37128	0.455527	1.37128	up	6.24326e-06	0.000117924
25842	ASF1A	anti-silencing function 1A histone chaperone	7.62827	7.72467	7.6789	7.1554	7.20373	7.31679	-1.36791	-0.451973	1.36791	down	1.61686e-07	7.021e-06
84904	ARHGEF39	Rho guanine nucleotide exchange factor 39	5.54402	5.64935	5.68679	5.12294	5.17361	5.22027	-1.37026	-0.454447	1.37026	down	7.42064e-06	0.000134667
83719	YPEL3	yippee like 3	6.32302	6.42094	6.39027	6.84742	6.89515	6.83482	1.39576	0.481053	1.39576	up	1.16564e-07	5.45314e-06
23037	PDZD2	PDZ domain containing 2	6.05466	5.97925	5.86149	6.36965	6.31066	6.38959	1.31176	0.3915	1.31176	up	1.44696e-05	0.000227717
1017	CDK2	cyclin-dependent kinase 2	7.77534	7.74464	7.84105	7.31284	7.3628	7.28414	-1.38231	-0.467083	1.38231	down	1.80119e-08	1.29318e-06
79912	PYROXD1	pyridine nucleotide-disulphide oxidoreductase domain 1	5.50019	5.5158	5.59551	5.04556	5.00121	5.19683	-1.3717	-0.455967	1.3717	down	1.47882e-05	0.000231342
9397	NMT2	N-myristoyltransferase 2	5.72404	5.78384	6.02989	6.60959	6.77308	6.83649	1.85806	0.893797	1.85806	up	1.89052e-08	1.34019e-06
9331	B4GALT6	UDP-Gal:betaGlcNAc beta 1,4- galactosyltransferase, polypeptide 6	3.72703	3.80914	4.13423	3.39119	3.29163	3.35713	-1.45749	-0.543483	1.45749	down	9.29557e-05	0.00100834
9841	ZBTB24	zinc finger and BTB domain containing 24	6.12681	6.2141	6.20804	5.63925	5.8338	5.8625	-1.3236	-0.404467	1.3236	down	2.89739e-05	0.000399562
55032	SLC35A5	solute carrier family 35 member A5	6.42986	6.63852	6.58108	5.74032	5.96697	6.05026	-1.54825	-0.630637	1.54825	down	1.14537e-06	3.1668e-05
134429	STARD4	StAR related lipid transfer domain containing 4	6.96776	7.01591	7.12654	5.68893	5.75244	5.87855	-2.40066	-1.26343	2.40066	down	7.49211e-12	4.46621e-09
116068	LYSMD3	LysM, putative peptidoglycan-binding, domain containing 3	8.2724	8.32507	8.13247	8.63163	8.60186	8.69444	1.3189	0.39933	1.3189	up	4.02321e-07	1.42218e-05
127602	DNAH14	dynein, axonemal, heavy chain 14	5.48616	5.69974	5.63346	5.1326	5.12717	5.40869	-1.30462	-0.383633	1.30462	down	0.000472367	0.00367216
2621	GAS6	growth arrest specific 6	8.87324	8.90348	8.87	9.28258	9.31519	9.27734	1.32819	0.409463	1.32819	up	5.38346e-10	9.45567e-08
7026	NR2F2	nuclear receptor subfamily 2 group F member 2	6.51536	6.48567	6.51677	6.92211	7.05432	6.88253	1.36325	0.447053	1.36325	up	6.46715e-07	2.04701e-05
3720	JARID2	jumonji and AT-rich interaction domain containing 2	7.03339	6.95679	7.00545	7.3388	7.39518	7.42912	1.30963	0.389157	1.30963	up	3.59323e-07	1.30057e-05
54942	FAM206A	family with sequence similarity 206 member A	8.12573	8.17792	8.0095	7.32079	7.35373	7.32927	-1.70502	-0.769787	1.70502	down	6.33283e-11	1.87061e-08
5295	PIK3R1	phosphoinositide-3-kinase regulatory subunit 1	4.89889	4.80089	5.01932	5.51811	5.41784	5.59969	1.52152	0.605513	1.52152	up	1.42853e-06	3.74444e-05
5328	PLAU	plasminogen activator, urokinase	9.40655	9.47684	9.52789	8.85757	8.90135	8.91345	-1.49447	-0.579637	1.49447	down	6.06833e-11	1.82254e-08
7485	WRB	tryptophan rich basic protein	8.31352	8.27917	8.27625	7.81251	7.82684	7.96592	-1.33906	-0.421223	1.33906	down	8.39052e-08	4.21605e-06
57211	ADGRG6	adhesion G protein-coupled receptor G6	7.80328	7.83533	7.69786	8.17476	8.18958	8.1867	1.32396	0.404857	1.32396	up	7.00162e-08	3.64435e-06
3569	IL6	interleukin 6	9.71392	9.79728	9.81839	9.17	9.17583	9.25863	-1.48972	-0.575043	1.48972	down	7.52704e-11	2.16163e-08
93166	PRDM6	PR domain containing 6	3.32737	3.64169	3.66698	3.81911	3.93549	4.08174	1.3196	0.4001	1.3196	up	0.00153969	0.00943468
646243	CXADRP2	coxsackie virus and adenovirus receptor pseudogene 2	3.88677	3.99715	4.07787	4.27657	4.41777	4.41913	1.30486	0.383893	1.30486	up	0.00030686	0.00260814
79184	BRCC3	BRCA1/BRCA2-containing complex subunit 3	6.20162	6.22869	6.27316	5.64472	5.71498	5.68476	-1.46714	-0.553003	1.46714	down	9.89801e-08	4.84279e-06
145781	GCOM1	GRINL1A complex locus 1	8.15427	8.22848	8.26176	7.72888	7.73576	7.77683	-1.38288	-0.46768	1.38288	down	6.02239e-09	5.77914e-07
84364	ARFGAP2	ADP ribosylation factor GTPase activating protein 2	6.37109	6.42865	6.45919	5.85865	6.03675	6.01224	-1.36645	-0.45043	1.36645	down	2.94011e-06	6.49863e-05
80306	MED28	mediator complex subunit 28	7.46484	7.46901	7.48679	7.10859	7.04347	7.04347	-1.32719	-0.40837	1.32719	down	8.35408e-08	4.20849e-06
92737	DNER	delta/notch like EGF repeat containing	4.52275	4.50956	4.07255	4.77983	4.70851	4.94219	1.35838	0.44189	1.35838	up	0.00130428	0.0082448
258010	SVIP	small VCP/p97-interacting protein	7.13506	7.06073	7.25546	5.83073	5.791	5.85858	-2.50298	-1.32365	2.50298	down	1.28468e-12	1.26361e-09
79191	IRX3	iroquois homeobox 3	6.82359	6.8671	7.03292	7.51465	7.56684	7.54356	1.55166	0.633813	1.55166	up	8.26565e-09	7.24284e-07
6426	SRSF1	serine/arginine-rich splicing factor 1	9.2778	9.27314	9.32747	8.54372	8.54802	8.5251	-1.68629	-0.753857	1.68629	down	2.55996e-13	4.02876e-10
3162	HMOX1	heme oxygenase 1	7.37814	7.38438	7.4459	6.78359	6.85055	6.95728	-1.45297	-0.539	1.45297	down	3.21882e-08	1.96648e-06
9315	NREP	neuronal regeneration related protein	4.33277	4.40375	4.26733	4.73565	4.7465	4.84818	1.35864	0.44216	1.35864	up	3.27864e-05	0.000438013
116984	ARAP2	ArfGAP with RhoGAP domain, ankyrin repeat and PH domain 2	5.14745	5.09267	5.24252	4.77138	4.67622	4.8598	-1.31198	-0.391747	1.31198	down	0.000117179	0.00121566
100137049	PLA2G4B	phospholipase A2, group IVB (cytosolic)	4.89543	5.00199	4.99303	4.48291	4.76251	4.3245	-1.35677	-0.440177	1.35677	down	0.000466486	0.00363362
10776	ARPP19	cAMP regulated phosphoprotein 19kDa	9.55473	9.57282	9.58676	8.8301	8.83627	8.84209	-1.66472	-0.735283	1.66472	down	9.33739e-14	1.92843e-10
1633	DCK	deoxycytidine kinase	6.74047	6.68569	6.71177	6.23017	6.19085	6.31265	-1.38327	-0.468087	1.38327	down	3.01164e-07	1.13605e-05
91408	BTF3L4	basic transcription factor 3-like 4	7.67813	7.70866	7.76282	8.14835	8.12112	8.22655	1.36491	0.448803	1.36491	up	1.76795e-08	1.27864e-06
23657	SLC7A11	solute carrier family 7 (anionic amino acid transporter light chain, xc- system), member 11	8.91433	8.91269	8.8622	8.1706	8.16731	8.13946	-1.66703	-0.737283	1.66703	down	9.6626e-13	1.02747e-09
55329	MNS1	meiosis specific nuclear structural 1	5.35982	5.54725	5.4676	4.75564	5.01722	5.17103	-1.39178	-0.476927	1.39178	down	0.00017191	0.00163927
3149	HMGB3	high mobility group box 3	6.53038	6.65379	6.75097	6.20667	6.33676	6.23579	-1.30614	-0.385307	1.30614	down	2.26517e-05	0.000325259
23171	GPD1L	glycerol-3-phosphate dehydrogenase 1-like	6.9776	6.85205	6.87815	6.46117	6.36357	6.55351	-1.3596	-0.443183	1.3596	down	1.98235e-06	4.78195e-05
125208	RPS2P46	ribosomal protein S2 pseudogene 46	11.2974	11.2497	10.7588	10.7788	10.4044	10.3891	-1.49266	-0.577883	1.49266	down	0.000197087	0.00182968
3725	JUN	jun proto-oncogene	9.61609	9.62177	9.62689	10.011	10.0148	10.0322	1.31746	0.397757	1.31746	up	8.34067e-11	2.31095e-08
23405	DICER1	dicer 1, ribonuclease type III	8.36273	8.40456	8.26812	8.84243	8.7178	8.82036	1.36452	0.448393	1.36452	up	3.42116e-08	2.06675e-06
57659	ZBTB4	zinc finger and BTB domain containing 4	8.97165	8.95129	8.9871	9.46409	9.44306	9.44635	1.39586	0.481153	1.39586	up	3.54284e-11	1.34737e-08
286101	ZNF252P	zinc finger protein 252, pseudogene	5.94775	5.97837	6.19446	6.36176	6.38707	6.51892	1.3035	0.38239	1.3035	up	8.30597e-05	0.000920276
23308	ICOSLG	inducible T-cell co-stimulator ligand	4.06927	4.02564	4.08581	4.72624	4.21832	4.3942	1.30678	0.386013	1.30678	up	0.0027543	0.0149717
64859	NABP1	nucleic acid binding protein 1	6.8998	6.8188	6.75573	7.76141	7.53309	7.75883	1.81462	0.859667	1.81462	up	9.42996e-10	1.42697e-07
25994	HIGD1A	HIG1 hypoxia inducible domain family member 1A	5.93339	5.97908	6.09867	5.44128	5.48238	5.54816	-1.42712	-0.513107	1.42712	down	1.32923e-06	3.53492e-05
91252	SLC39A13	solute carrier family 39 (zinc transporter), member 13	7.91697	7.91153	8.00495	8.30215	8.34173	8.33684	1.30353	0.382423	1.30353	up	4.57435e-08	2.59294e-06
55847	CISD1	CDGSH iron sulfur domain 1	4.65982	5.08377	4.8598	5.30544	5.18658	5.29052	1.31317	0.39305	1.31317	up	0.000869626	0.00597271
132864	CPEB2	cytoplasmic polyadenylation element binding protein 2	6.39575	6.50384	6.41953	7.13764	7.0498	7.1588	1.59738	0.675707	1.59738	up	2.1235e-09	2.55495e-07
51135	IRAK4	interleukin 1 receptor associated kinase 4	5.93307	5.97693	5.93354	5.09909	5.1714	5.23819	-1.71509	-0.778287	1.71509	down	5.68931e-09	5.56817e-07
57132	CHMP1B	charged multivesicular body protein 1B	7.38898	7.33957	7.31219	6.83467	6.95192	6.9514	-1.35121	-0.43425	1.35121	down	2.2256e-07	8.87174e-06
31	ACACA	acetyl-CoA carboxylase alpha	4.7912	4.7258	4.94866	4.32359	4.46486	4.46903	-1.322	-0.402727	1.322	down	0.000190438	0.00178008
201799	TMEM154	transmembrane protein 154	7.56315	7.49123	7.58337	7.16985	7.11349	7.17259	-1.31398	-0.39394	1.31398	down	2.03805e-07	8.30072e-06
113	ADCY7	adenylate cyclase 7	6.17375	6.16372	6.21227	5.77135	5.77107	5.82912	-1.31288	-0.392733	1.31288	down	4.62e-06	9.31261e-05
51434	ANAPC7	anaphase promoting complex subunit 7	6.14469	6.26021	5.96242	6.47855	6.46053	6.63513	1.32161	0.402297	1.32161	up	8.21121e-05	0.000912604
3161	HMMR	hyaluronan-mediated motility receptor (RHAMM)	6.08241	6.11163	6.21317	5.62557	5.53231	5.70821	-1.42771	-0.513707	1.42771	down	1.38243e-06	3.64546e-05
401387	LRRD1	leucine-rich repeats and death domain containing 1	9.10426	9.06173	9.10966	8.61245	8.61493	8.53148	-1.41971	-0.505597	1.41971	down	2.56148e-10	5.37108e-08
64420	SUSD1	sushi domain containing 1	6.95547	6.89184	7.00287	6.51463	6.58533	6.5388	-1.32299	-0.403807	1.32299	down	8.58485e-07	2.54339e-05
116372	LYPD1	LY6/PLAUR domain containing 1	4.92464	4.65473	4.82131	5.2923	5.16299	5.29307	1.36531	0.449227	1.36531	up	6.28085e-05	0.000734836
152002	XXYLT1	xyloside xylosyltransferase 1	5.7919	5.68665	5.73784	5.35329	5.27271	5.28334	-1.35255	-0.435683	1.35255	down	6.33657e-06	0.000119457
118429	ANTXR2	anthrax toxin receptor 2	6.62728	6.81978	6.90428	7.35512	7.41993	7.41192	1.52825	0.611877	1.52825	up	7.95355e-08	4.04295e-06
9069	CLDN12	claudin 12	6.59739	6.41263	6.42422	6.22682	6.0229	6.03028	-1.30563	-0.384747	1.30563	down	6.55668e-05	0.000759617
55437	STRADB	STE20-related kinase adaptor beta	5.69819	5.77762	5.95088	5.11728	5.11184	5.37197	-1.52471	-0.608533	1.52471	down	4.50523e-06	9.14151e-05
54503	ZDHHC13	zinc finger, DHHC-type containing 13	7.40468	7.40686	7.27516	6.9479	6.8376	6.9779	-1.35764	-0.4411	1.35764	down	5.99341e-07	1.92023e-05
5962	RDX	radixin	6.39059	6.49207	6.67653	6.12151	5.8926	6.15193	-1.37973	-0.464383	1.37973	down	4.31083e-05	0.000545004
10184	LHFPL2	lipoma HMGIC fusion partner-like 2	5.58074	5.78192	5.71622	4.94887	5.05172	5.05243	-1.59691	-0.675287	1.59691	down	1.62185e-07	7.021e-06
632	BGLAP	bone gamma-carboxyglutamate (gla) protein	6.09321	5.96289	6.18543	6.41531	6.49235	6.52346	1.31634	0.39653	1.31634	up	1.86347e-05	0.000277396
3021	H3F3B	H3 histone, family 3B (H3.3B)	8.44837	8.39597	8.47681	7.67301	7.67133	7.67655	-1.70144	-0.766753	1.70144	down	2.54574e-12	2.08666e-09
1728	NQO1	NAD(P)H dehydrogenase, quinone 1	10.5136	10.5023	10.5624	9.87753	9.92608	9.91175	-1.53791	-0.620973	1.53791	down	4.68198e-13	6.66552e-10
54749	EPDR1	ependymin related 1	7.73218	7.7224	7.70061	7.12253	7.26075	7.24586	-1.42275	-0.508683	1.42275	down	1.44686e-08	1.10321e-06
284040	CDRT4	CMT1A duplicated region transcript 4	6.48044	6.36666	6.4305	6.7663	6.82371	6.95841	1.34128	0.423607	1.34128	up	3.34415e-06	7.16624e-05
9444	QKI	QKI, KH domain containing, RNA binding	5.20884	5.26724	5.50251	5.85097	5.96517	6.04384	1.54449	0.62713	1.54449	up	1.80766e-06	4.4534e-05
217	ALDH2	aldehyde dehydrogenase 2 family (mitochondrial)	7.87975	7.78143	7.8192	7.02014	7.13947	7.10609	-1.66812	-0.738227	1.66812	down	1.18261e-10	3.04109e-08
3312	HSPA8	heat shock protein family A (Hsp70) member 8	6.22094	6.18222	6.2311	5.73675	5.7325	5.79597	-1.37206	-0.456347	1.37206	down	8.47836e-07	2.51943e-05
5537	PPP6C	protein phosphatase 6, catalytic subunit	7.44972	7.37178	7.46778	6.86106	6.97771	7.02277	-1.3908	-0.475913	1.3908	down	1.52551e-07	6.75137e-06
115752	DIS3L	DIS3 like exosome 3'-5' exoribonuclease	7.64612	7.63784	7.68968	8.03806	8.03806	8.06249	1.30887	0.388323	1.30887	up	2.55517e-08	1.66994e-06
11196	SEC23IP	SEC23 interacting protein	7.37079	7.31364	7.42787	6.38998	6.51822	6.54759	-1.84741	-0.885503	1.84741	down	9.98448e-11	2.67231e-08
9666	DZIP3	DAZ interacting zinc finger protein 3	5.8734	5.84734	5.90007	5.33993	5.50738	5.50892	-1.33934	-0.421527	1.33934	down	1.4017e-05	0.000222283
51012	PRELID3B	PRELI domain containing 3B	9.5696	9.58419	9.51799	9.17253	9.04615	9.12967	-1.35768	-0.441143	1.35768	down	2.82076e-09	3.24503e-07
80256	FAM214B	family with sequence similarity 214 member B	6.92487	6.99553	6.93959	6.58393	6.62241	6.47104	-1.31422	-0.394203	1.31422	down	2.25222e-06	5.27763e-05
839	CASP6	caspase 6	7.12388	7.16475	7.37163	7.55769	7.65607	7.64941	1.3204	0.40097	1.3204	up	6.90868e-06	0.000127687
9531	BAG3	BCL2 associated athanogene 3	9.72373	9.71866	9.7337	9.10286	9.16704	9.14061	-1.50371	-0.588527	1.50371	down	2.53078e-12	2.08666e-09
2633	GBP1	guanylate binding protein 1, interferon-inducible	6.23004	6.24878	6.23077	5.23373	5.57882	5.38652	-1.78613	-0.83684	1.78613	down	3.05967e-08	1.89574e-06
55656	INTS8	integrator complex subunit 8	7.80662	7.70256	7.83893	6.67343	6.75752	6.83911	-2.03639	-1.02602	2.03639	down	1.00437e-11	5.34001e-09
5581	PRKCE	protein kinase C, epsilon	8.10765	8.17969	8.19978	7.73789	7.76692	7.84429	-1.30075	-0.37934	1.30075	down	1.6766e-07	7.16223e-06
91694	LONRF1	LON peptidase N-terminal domain and ring finger 1	4.80137	4.71907	4.93412	5.17813	5.26814	5.24101	1.32952	0.410907	1.32952	up	6.73172e-05	0.00077715
2926	GRSF1	G-rich RNA sequence binding factor 1	6.51993	6.41197	6.45378	5.41847	5.34071	5.32922	-2.1422	-1.09909	2.1422	down	2.36829e-11	1.0128e-08
374986	FAM73A	family with sequence similarity 73 member A	6.03035	6.05452	6.11958	5.59898	5.61591	5.76678	-1.32647	-0.407593	1.32647	down	1.50447e-05	0.000234238
125170	MIEF2	mitochondrial elongation factor 2	6.58518	6.51581	6.56712	6.89683	7.03969	6.94618	1.32396	0.404863	1.32396	up	1.32704e-06	3.53492e-05
84250	SLF1	SMC5-SMC6 complex localization factor 1	6.08646	6.03048	6.19932	5.7151	5.70216	5.7446	-1.30568	-0.3848	1.30568	down	1.75677e-05	0.000264517
